# Supplementary material for: The steric hindrance effect of bulky groups on the formation of columnar superlattices and optoelectronic properties of triphenylene-based discotic liquid crystals
Source: Royal Society of Chemistry journal article supplement (doi:10.1039/d2nj01542k), 2022-01-01
Supplement: d2nj01542k1.pdf [file d2nj01542k1.pdf]

# Electronic Supplementary Information

## The steric hindrance effect of bulky groups on the formation of columnar superlattices and optoelectronic properties of triphenylene-based discotic liquid crystals

Chenhui Wei,<sup>1</sup> Xinyue Zhao,<sup>1</sup> Ao Zhang, Mengfei Wang, Xinran Zhang, Maoxin Zhang,  
Jianchuang Wang, Yi Fang,\* Hao Wu\* and Chunxiu Zhang\*

### Table of Contents

|                                                                                                             |    |
|-------------------------------------------------------------------------------------------------------------|----|
| S1. Materials .....                                                                                         | 2  |
| S2. Instrumentations .....                                                                                  | 2  |
| S3. Syntheses .....                                                                                         | 2  |
| S4. Supplementary FT-IR results .....                                                                       | 9  |
| S5. Supplementary <sup>1</sup> H NMR results .....                                                          | 15 |
| S6. Supplementary <sup>13</sup> C NMR results .....                                                         | 21 |
| S7. Supplementary MS results .....                                                                          | 27 |
| S8. Full citations for Gaussian 09 program.....                                                             | 31 |
| S9. Supplementary Gauss stimulation results.....                                                            | 31 |
| S10. Table of dipole moments.....                                                                           | 35 |
| S11. Mesophase of T5C2-3 ~ T5C2-6, T5F2 and T5A2.....                                                       | 36 |
| S12. Mesophase of T5C36-3 ~ T5C36-6, T5F36 and T5A36.....                                                   | 38 |
| S13. Molecular structures and DSC curves of T5E2 and T5E36 .....                                            | 40 |
| S14. POM images of samples T5C2-4, T5C36-4, T5C36-5 and T5C36-6 annealed in the<br>liquid crystal cell..... | 41 |
| S15. Table of charge carrier mobilities.....                                                                | 42 |

## S1. Materials

All chemicals were purchased from Aladdin, and all solvents from Aldrich. All chemicals and solvents were used without further purification. Silica gel 60 (200-300 mesh ASTM) and silica gel 60 glass thin-layer chromatography were used for the purification and identification of the reaction, respectively.

## S2. Instrumentations

**S2.1. Chemical structure characterizations :** The  $^1\text{H}$ -NMR spectra were recorded by a Bruker NMR spectrometer (DMX 400 MHz) in  $\text{CDCl}_3$ , Chemical shifts are given as units of measurement and expressed in parts per million ( $\delta$ ) with tetra-methylsilane (TMS) as a reference. Multiplicities of peaks are expressed as s = singlet, d = doublet, t = triplet, m = multiplet; The  $^{13}\text{C}$ -NMR spectra were recorded by a Bruker 700M NMR spectrometer in  $\text{CDCl}_3$ ; The high resolution mass spectrum was recorded on a Bruker Apex IV FTMS mass spectrometer; The KBr pellets were used to make the test samples and the infrared spectrum (FT-IR) was recorded on a Shimadzu FTIR-8400 spectrometer by Fourier transform.

**S2.2. Mesophase characterizations of samples:** The thermal properties of discotic liquid crystals were characterized by using differential scanning calorimeter (DSC) on a Netzsch DSC 200. Its optical properties were characterized by a Polarizing Microscope (POM) on a Leica DM4500P with a Linkam TMS94 hot stage.

**S2.3. Self-assembly properties of samples:** The structural characterizations of samples were characterized by 1D wide-angle X-ray diffraction (1DWAXD) through a Bruker D8 Advance diffractometer equipped with a variable temperature controller; two-dimensional wide-angle X-ray diffraction (2DWAXD) using a 40KV FL tube as the X-ray source (Cu Ka).

## S3. Syntheses

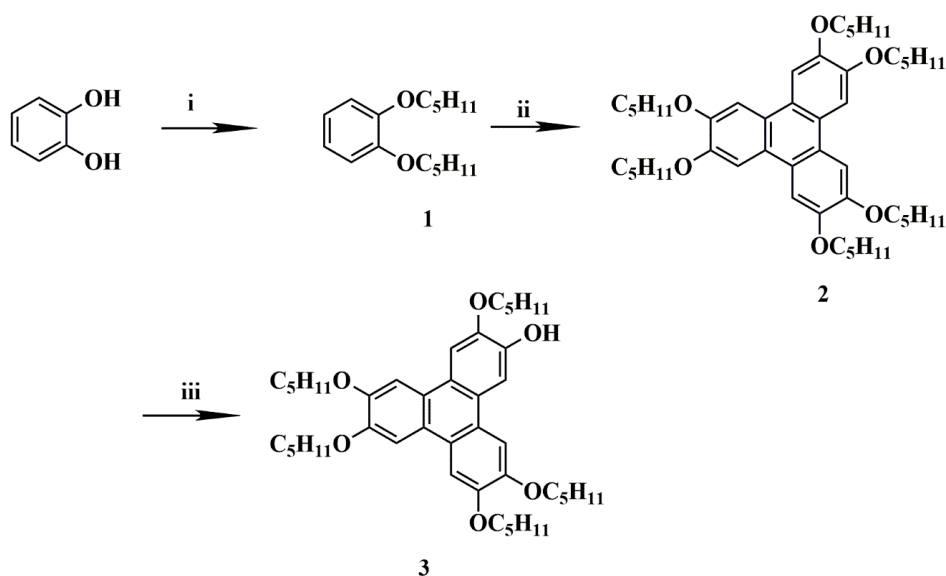

**Preparation of 1,2-dipentoxybenzene (1).** 1-Bromopentane (181g, 1.2mol) was added to a vigorously stirred solution of catechol (44g, 0.4mol) and potassium carbonate (331g) in ethanol (100ml) and acetone (200ml) under nitrogen. The reaction mixture was stirred under reflux for 24 hours. Then the mixture was filtered and the solvent was removed in vacuo. Distillation of the residue at 120-122°C afforded as a colorless oil (96g, 96%). TLC R<sub>f</sub>: 0.65 (dichloromethane-hexane 1:1). <sup>1</sup>H NMR (400 MHz, CDCl<sub>3</sub>) δ<sub>H</sub>: 6.90 (m, 4H, Ar-H), 4.02 (s, 4H, OCH<sub>2</sub>), 1.80-1.87 (m, 4H, OCH<sub>2</sub>CH<sub>2</sub>), 1.38-1.50 (m, 8H, OCH<sub>2</sub>CH<sub>2</sub>CH<sub>2</sub>CH<sub>2</sub>), 0.97 (t, 6H, CH<sub>3</sub>).

**Preparation of 2,3,6,7,10,11-hexapentyloxytriphenylene (2).** Compound 1 (15g, 0.06mol) was added to a vigorously stirred suspension of Iron(III) chloride (31.1g, 0.19mol) in dichloromethane (100ml). The reaction occurred with vigorous evolution of gas and was quenched with methanol (700ml) after 2 hours. which was added to bromopentane (18.12g) and potassium carbonate (316.56g) in acetone (150 ml) under nitrogen, then heated to 60°C and refluxed. The reaction mixture was filtered and the filtrate was concentrated in vacuo to give a pale yellow powder, which was recrystallized from ethanol to give 2 as pale yellow powder (11.8g, 79.3%). <sup>1</sup>H NMR (400 MHz, CDCl<sub>3</sub>) δ<sub>H</sub>: 7.85 (s, 6H, Ar-H), 4.25 (t, 12H, OCH<sub>2</sub>), 1.92-1.99 (m, 12H, CH<sub>2</sub>), 1.42-1.67 (m, 24H, CH<sub>2</sub>), 0.99 (t, 18H, CH<sub>3</sub>).

**Preparation of 2-hydroxy-3,6,7,10,11-pentapentyloxytriphenylene (3).** To a cooled suspension of catechol (11g) in CH<sub>2</sub>Cl<sub>2</sub> (70 mL), a solution (0 °C) of BBr<sub>3</sub> (10.6ml) was added slowly with stirring 3h under nitrogen. The mixture was brought to room temperature, the solvent removed and the product distilled under vacuum to give B-Bromocatecholboronane as white solid (9.63g). The solid was then used to make a 0.5 mol/L and this was used for the next ether cleavage reactions. A solution of 2 (14.88g, 0.02 mol) was dissolved in anhydrous CH<sub>2</sub>Cl<sub>2</sub> (200ml) and cooled to 0 °C. To this was added (48ml, 1.2equiv) of B-Bromocatecholboronane solution in CH<sub>2</sub>Cl<sub>2</sub> under argon and the mixture was stirred at room temperature for 24h. After that it was poured over ice-water and extracted with CH<sub>2</sub>Cl<sub>2</sub>, the combined extract was dried with anhydrous Na<sub>2</sub>SO<sub>4</sub> overnight, solvent was removed under vacuum and the crude product was purified by a silica gel column chromatography, eluting with 1: 32 ethyl acetate: light petroleum to give 3 as white powder which was recrystallized from ethanol (6.2g, 46%). <sup>1</sup>H NMR(400 MHz, CDCl<sub>3</sub>) δ<sub>H</sub>: 7.96-7.77 (m, 6H, Ar-H), 5.91 (s, 1H, OH), 4.31-4.19 (t, 10H, CH<sub>2</sub>), 1.97-1.90 (m, 10H, OCH<sub>2</sub>CH<sub>2</sub>), 0.97 (t, 15H, CH<sub>3</sub>).

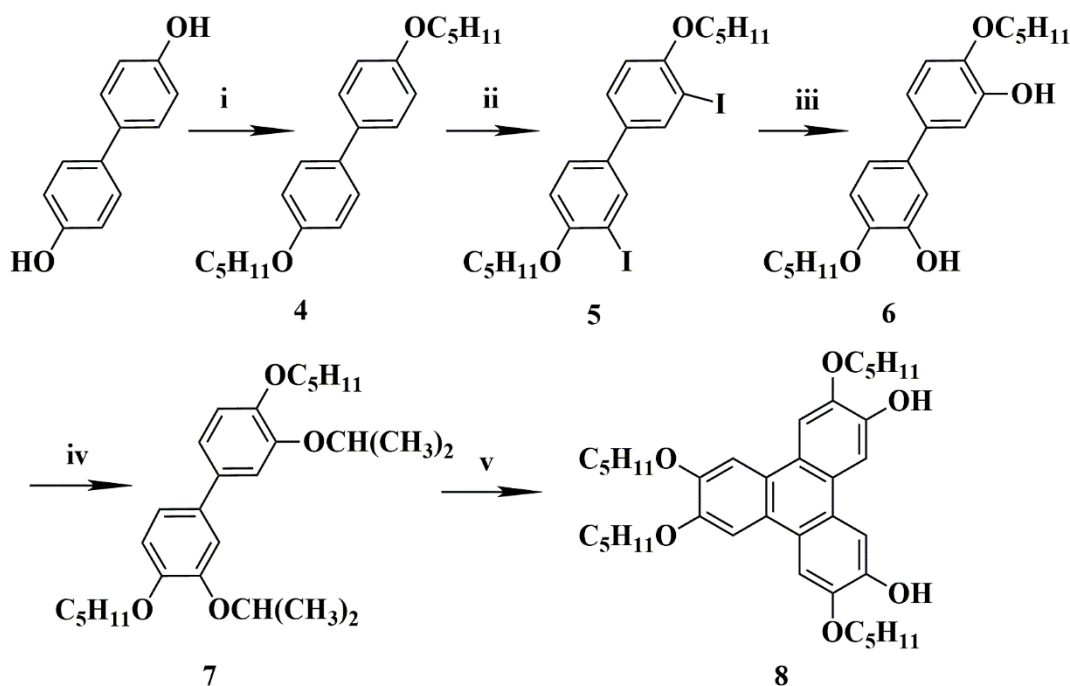

**Preparation of 4,4'-dipentyloxyphenyl (4).** A mixture of 4,4'-dihydroxybiphenylene (65.2 g, 0.35 mol), K<sub>2</sub>CO<sub>3</sub> (160 g, 1.12 mol), hexadecyl trimethyl ammonium bromide (catalytic amount) and KI catalytic amount in ethanol/acetone (300/100 ml) was refluxed under argon for 1 h, then 1-bromopentane (145 g, 0.96 mol) was added, and the mixture was refluxed for another 24 h. Once the reaction was complete, the reaction mixture was poured into 1:1 ice-water to precipitate the product. The white precipitate was filtered and washed several times by water resulting in the crude product. After recrystallization from ethanol, white scaly solid was obtained (109.6 g, 97%). TLC R<sub>f</sub>: 0.61 (dichloromethane-hexane 1:1). <sup>1</sup>H NMR (400 MHz, CDCl<sub>3</sub>), δ<sub>H</sub>: 7.57-7.38 (m, 4H, Ar-H), 6.95 (d, J=6.3 Hz, 4H, Ar-H), 4.08-3.97 (m, 4H, OCH<sub>2</sub>), 1.86-1.77 (m, 4H, OCH<sub>2</sub>CH<sub>2</sub>), 1.49-1.28 (m, 8H, CH<sub>2</sub>), 0.97-0.85 (m, 6H, CH<sub>3</sub>).

**Preparation of 3,3'-diiodo-4,4'-dipentyloxyphenyl (5).** A mixture of glacial acetic acid 200 g, iodine (42 g, 168 mmol), iodic acid (17.74 g, 100 mmol), deionized water 60 ml, chloroform 140 ml and 4,4'-dipentyloxybiphenyl (65.2 g, 200 mmol) was stirred for a while, and then concentrated sulphuric acid (7.6 g) was added and the mixture was heated with stirring at 85°C for 20 h. After the reaction was complete, 280 ml of chloroform and 120 ml deionized water were added and the mixture was stirred for 10 min. the organic layer was separated and washed by saturated Na<sub>2</sub>SO<sub>3</sub> solution three times and deionized water once. The organic layer was dried over anhydrous sodium sulfate and passed through a short silica column (chloroform) to get the crude product, 3,3'-diiodo-4,4'-dipentyloxybiphenyl. The crude product was recrystallized by ethanol to obtain the white solid (109.4 g, 94.6%). TLC R<sub>f</sub>: 0.71 (dichloromethane-hexane 1:1). <sup>1</sup>H NMR (400 MHz, CDCl<sub>3</sub>), δ<sub>H</sub>: 7.93 (s, 2H, Ar-H), 7.42 (dd, J=1.5 Hz, J=8.4 Hz, 2H, Ar-H), 6.82 (d, J=8.4 Hz, 2H, Ar-H), 4.04 (t, J=6.6 Hz, 4H, OCH<sub>2</sub>), 1.91-1.82 (m, 4H, OCH<sub>2</sub>CH<sub>2</sub>), 1.57-1.36 (m, 8H, CH<sub>2</sub>), 0.99-0.89 (m, 6H, CH<sub>3</sub>).

**Preparation of 3,3'-dihydroxy-4,4'-dipentyloxyphenyl (6).** A mixture of PEG-400 480 ml, deionized water 120 ml, KOH (67.2 g, 1.2 mol) and 5 (57.8 g, 100 mmol) was stirred under nitrogen protection for 30 min and then CuI (7.8 g, 20 mmol) was added carefully. The mixture was heated to 140°C under nitrogen protection for 36 h. After the reaction was complete, the reaction mixture was cooled to room temperature. Hydrochloric acid (1 M) was added to acidify the solution (pH = 2) and the solution was extracted with ethyl acetate (3×400ml). The organic layer was concentrated and recrystallized by ethanol (very small amount) to give white needle crystal (10.8g, 30%). TLC Rf: 0.28 (dichloromethane-hexane 1:1). <sup>1</sup>H NMR (400 MHz, CDCl<sub>3</sub>), δ<sub>H</sub>: 7.15 (s, 2H, Ar-H), 7.02 (dd, J=2.1Hz, J=6.3Hz, 2H, Ar-H), 6.88 (d, J=8.4Hz, 2H, Ar-H), 5.68 (s, 2H, OH), 4.07 (t, 4H, OCH<sub>2</sub>), 1.89-1.80 (m, 4H, OCH<sub>2</sub>CH<sub>2</sub>), 1.51-1.32 (m, 8H, CH<sub>2</sub>), 0.98-0.89 (m, 6H, CH<sub>3</sub>).

**Preparation of 3,3'-diisopropyl-4,4'-dipentyloxyphenyl (7).** A mixture of 6 (8g, 22 mmol), K<sub>2</sub>CO<sub>3</sub> (18 g, 132 mmol), hexadecyl trimethyl ammonium bromide (catalytic amount) and KI catalytic amount, ethanol/acetone (100/50 ml) was refluxed under argon for 1 h, then 2-bromopropane (5.3 g, 88 mmol) was added and the mixture was refluxed for another 24 h. Once the reaction was complete, the reaction mixture was filtered and the filtrate was concentrated to give the crude product. After recrystallization from ethanol (small amount), white scaly solid was obtained (8.8g, 90%). TLC Rf: 0.52 (dichloromethane-hexane 1:1). <sup>1</sup>H NMR(400 MHz, CDCl<sub>3</sub>), δ<sub>H</sub>: 7.12-7.08 (m, 4H, Ar-H), 6.94-6.85 (m, 2H, Ar-H), 4.56-4.46 (m, 2H, OCH), 4.01 (d, J=6.6Hz, 4H, OCH<sub>2</sub>), 1.88-1.79 (m, 4H, OCH<sub>2</sub>CH<sub>2</sub>), 1.56-1.50 (m, 20H, OCH(CH<sub>3</sub>)<sub>2</sub>/CH<sub>3</sub>), 0.94 (t, J=6.9Hz, 6H, CH<sub>3</sub>).

**Preparation of 3,6-dihydroxy-2,7,10,11-tetrakis(pentyloxy)triphenylene (8).** A mixture of 7 (6.65g, 15 mmol), 1,2-dipentyloxybenzene (5.65 g, 22.5 mmol) and anhydrous dichloromethane (80 ml) was stirred under nitrogen protection for 30 min and then anhydrous ferric chloride (9.25g, 57 mmol) was added slowly. The mixture was stirred vigorously for another 12 h at room temperature. After the reaction was complete, the reaction mixture was poured into 150 ml cool methanol carefully. The mixture was concentrated and filtered. The filter cake was purified by columnar chromatography (silica, CH<sub>2</sub>Cl<sub>2</sub>: EtOAc = 80:1) to give the final white product (5.4g, 60%) mp 142°C. TLC Rf: 0.27 (ethyl acetate-hexane 1:4). <sup>1</sup>H NMR (400 MHz, CDCl<sub>3</sub>), δ<sub>H</sub>: 7.94 (s, 2H, Ar-H), 7.81 (s, 2H, Ar-H), 7.75 (s, 2H, Ar-H), 5.88 (s, 2H, OH), 4.30-4.21 (m, 8H, OCH<sub>2</sub>), 2.00-1.91 (m, 8H, OCH<sub>2</sub>CH<sub>2</sub>), 1.62-1.40 (m, 16H, CH<sub>2</sub>), 0.99 (dd, J=6.0Hz, J=7.2Hz, 12H, CH<sub>3</sub>).

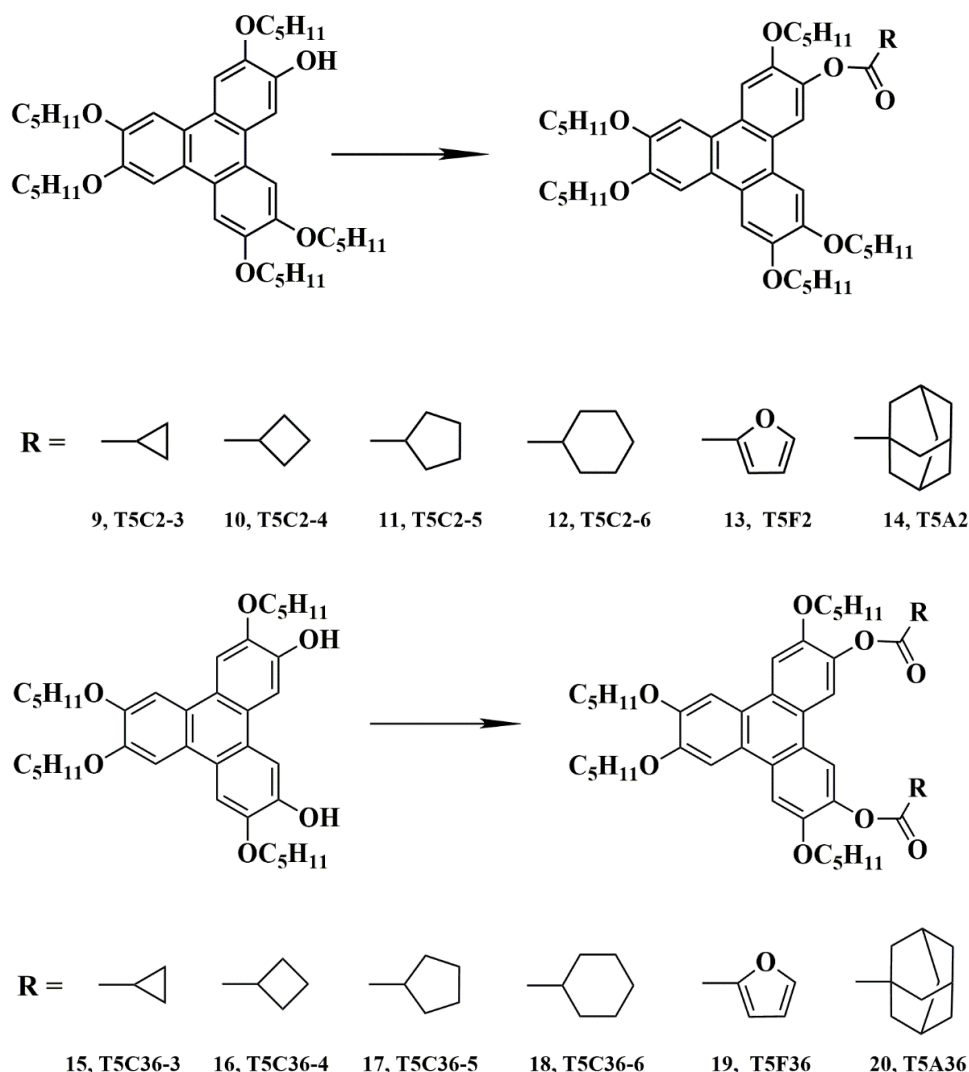

**Preparation of 2-ylcyclopropanecarboxylate-3,6,7,10,11-pentakis(pentyloxy)triphenylene (9).** A mixture of 2-hydroxy-3,6,7,10,11-pentapentyloxytriphenylene (0.5g, 0.74 mmol), cyclopropanecarboxylic acid (0.19g, 2.2 mmol), 4-Dimethylaminopyridine (catalytic amount) and anhydrous dichloromethane (30 ml) was stirred under nitrogen protection for 30 min then dicyclohexylcarbodiimide (catalytic amount) was added slowly. The mixture was refluxed for another 24 h. After the reaction was complete, the reaction solution was filtered under reduced pressure to remove most of the N, N'-dicyclohexylurea. The filtrate was evaporated to dryness under reduced pressure. The residue crude product was purified by column chromatography on silica eluting with ethyl acetate/petroleum ether (1:10) to give a white solid. The solid was recrystallized by absolute alcohol several times (0.51g, 92.3%). FT-IR ( $\text{cm}^{-1}$ ): 2958, 2937, 2861, 1746, 2922, 1521, 1267, 1158.  $^1\text{H}$  NMR (400 MHz, Chloroform-*d*)  $\delta$  8.08 (s, 1H), 7.91 – 7.73 (m, 5H), 4.22 (p,  $J = 6.2$  Hz, 10H), 2.01 – 1.86 (m, 11H), 1.61 – 1.37 (m, 22H), 1.31 – 1.23 (m, 2H), 0.97 (td,  $J = 7.3, 1.5$  Hz, 15H).  $^{13}\text{C}$  NMR (176 MHz, Chloroform-*d*)  $\delta$  173.21, 149.24, 139.85, 127.88, 123.15, 116.72, 107.94, 106.89, 106.08, 69.81, 69.59 – 68.65, 29.12, 28.38, 28.26, 22.58, 14.13, 12.87, 9.10. HRMS: calc.  $m/z$  742.48085 ( $\text{C}_{47}\text{H}_{66}\text{O}_7$ ), found  $m/z$  742.47667 ( $\text{M}$ ) $^+$ . According to the same method, other triphenylene derivatives were successfully synthesized.

**2-ylcyclobutanecarboxylate-3,6,7,10,11-pentakis(pentyloxy)triphenylene (10).** FT-IR ( $\text{cm}^{-1}$ ): 2962, 2937, 2864, 1748, 1521, 1267, 1146.  $^1\text{H}$  NMR (400 MHz, Chloroform-*d*)  $\delta$  8.06 (s, 1H), 7.89 – 7.74 (m, 5H), 4.31 – 4.15 (m, 10H), 3.58 – 3.45 (m, 1H), 2.66 – 2.49 (m, 2H), 2.40 (dddd,  $J$  = 10.6, 8.6, 6.5, 3.4 Hz, 2H), 2.14 – 1.82 (m, 12H), 1.58 – 1.37 (m, 20H), 0.97 (tdd,  $J$  = 7.2, 3.1, 2.0 Hz, 15H).  $^{13}\text{C}$  NMR (176 MHz, Chloroform-*d*)  $\delta$  173.70, 149.61, 148.83, 139.78, 127.88, 124.61, 123.31, 116.68, 107.97, 107.05, 106.54, 105.83, 69.81, 69.46, 69.23, 68.73, 38.06, 29.27 – 28.99, 28.34, 25.44, 22.58, 18.61, 14.11. HRMS: calc.  $m/z$  756.49650 ( $\text{C}_{48}\text{H}_{68}\text{O}_7$ ), found  $m/z$  756.49831 (M) $^+$ .

**2-ylcyclopentanecarboxylate-3,6,7,10,11-pentakis(pentyloxy)triphenylene (11).** FT-IR ( $\text{cm}^{-1}$ ): 2962, 2935, 2864, 1750, 1521, 1268, 1149.  $^1\text{H}$  NMR (400 MHz, Chloroform-*d*)  $\delta$  8.05 (s, 1H), 7.89 – 7.71 (m, 5H), 4.32 – 4.15 (m, 10H), 3.12 (p,  $J$  = 7.9 Hz, 1H), 2.18 – 2.05 (m, 4H), 2.00 – 1.78 (m, 12H), 1.70 (dp,  $J$  = 9.8, 3.2 Hz, 2H), 1.56 – 1.38 (m, 20H), 0.97 (tt,  $J$  = 7.2, 2.4 Hz, 15H).  $^{13}\text{C}$  NMR (176 MHz, Chloroform-*d*)  $\delta$  175.05, 149.64, 148.83, 127.84, 123.53, 123.08, 116.69, 108.01, 107.23, 106.89, 106.60, 105.72, 69.89, 69.76, 69.47, 69.26, 68.70, 43.71, 30.17, 29.26 – 29.00, 28.35, 26.06, 22.59, 14.11. HRMS: calc.  $m/z$  770.51215 ( $\text{C}_{49}\text{H}_{70}\text{O}_7$ ), found  $m/z$  770.51042 (M) $^+$ .

**2-ylcyclohexanecarboxylate-3,6,7,10,11-pentakis(pentyloxy)triphenylene (12).** FT-IR ( $\text{cm}^{-1}$ ): 2962, 2938, 2865, 1750, 1521, 1268, 1169.  $^1\text{H}$  NMR (400 MHz, Chloroform-*d*)  $\delta$  8.04 (s, 1H), 7.90 – 7.75 (m, 5H), 4.21 (dt,  $J$  = 11.6, 6.0 Hz, 10H), 2.75 – 2.63 (m, 1H), 2.18 (d,  $J$  = 12.9 Hz, 2H), 2.00 – 1.85 (m, 12H), 1.72 (t,  $J$  = 11.1 Hz, 4H), 1.55 – 1.28 (m, 22H), 0.97 (tt,  $J$  = 7.2, 2.0 Hz, 15H).  $^{13}\text{C}$  NMR (176 MHz, Chloroform-*d*)  $\delta$  174.21, 150.63 – 147.65, 139.81, 127.73, 124.85 – 122.33, 116.83, 107.22, 106.76, 105.71, 69.94 – 69.54, 69.37, 68.71, 43.20, 29.31 – 28.53, 28.35, 25.86, 25.49, 22.58, 14.11. HRMS: calc.  $m/z$  784.52780 ( $\text{C}_{50}\text{H}_{72}\text{O}_7$ ), found  $m/z$  784.52872 (M) $^+$ .

**2-ylfuran-2-carboxylate-3,6,7,10,11-pentakis(pentyloxy)triphenylene (13).** FT-IR ( $\text{cm}^{-1}$ ): 2958, 2939, 2860, 1740, 1514, 1266, 1176.  $^1\text{H}$  NMR (400 MHz, Chloroform-*d*)  $\delta$  8.21 (s, 1H), 7.85 (dd,  $J$  = 33.7, 13.9 Hz, 6H), 7.47 (dd,  $J$  = 3.6, 0.8 Hz, 1H), 6.64 (dd,  $J$  = 3.5, 1.8 Hz, 1H), 4.24 (d,  $J$  = 8.1 Hz, 10H), 2.05 – 1.79 (m, 10H), 1.54 – 1.22 (m, 20H), 1.03 – 0.84 (m, 15H).  $^{13}\text{C}$  NMR (176 MHz, Chloroform-*d*)  $\delta$  156.79, 151.49 – 148.08, 147.08, 144.15, 139.26, 128.18, 124.66, 123.18, 119.37, 116.87, 112.19, 107.88, 107.24, 106.84, 106.39, 70.02 – 69.27, 69.12, 29.21 – 28.63, 28.49 – 27.71, 22.70 – 22.24, 14.23 – 13.71. HRMS: calc.  $m/z$  768.46012 ( $\text{C}_{48}\text{H}_{64}\text{O}_8$ ), found  $m/z$  768.45976 (M) $^+$ .

**2-yladamantane-1-carboxylate-3,6,7,10,11-pentakis(pentyloxy)triphenylene(14).** FT-IR ( $\text{cm}^{-1}$ ): 2958, 2926, 2850, 1737, 1516, 1265, 1060.  $^1\text{H}$  NMR (400 MHz, Chloroform-*d*)  $\delta$  8.01 (s, 1H), 7.91 – 7.75 (m, 5H), 4.30 – 4.14 (m, 10H), 2.16 (dd,  $J$  = 20.5, 3.0 Hz, 9H), 1.99 – 1.77 (m, 16H), 1.59 – 1.42 (m, 20H), 0.97 (td,  $J$  = 7.2, 2.2 Hz, 15H).  $^{13}\text{C}$  NMR (176 MHz, Chloroform-*d*)  $\delta$  175.92, 149.59, 148.81, 139.96, 127.74, 124.56, 123.08, 116.67, 108.00, 107.29 – 106.31, 105.57, 69.88, 69.74, 69.39, 68.61, 41.12, 39.06, 36.6, 29.29 – 29.01, 28.39, 28.07, 22.72 – 22.48, 14.12. HRMS: calc.  $m/z$  836.55910 ( $\text{C}_{54}\text{H}_{76}\text{O}_7$ ), found  $m/z$  836.55659 (M) $^+$ .

**3,6-diylidicyclopropanecarboxylate-2,7,10,11-tetrakis(pentyloxy)triphenylene (15).** FT-IR ( $\text{cm}^{-1}$ ): 2962, 2936, 2868, 1745, 1521, 1267, 1170.  $^1\text{H}$  NMR (400 MHz, Chloroform-*d*)  $\delta$  8.06 (s, 2H), 7.84 (d,  $J$  = 6.1 Hz, 4H), 4.22 (dt,  $J$  = 13.4, 6.4 Hz, 8H), 1.99 – 1.84 (m, 10H), 1.44 (dq,  $J$  = 14.7, 7.5 Hz,

14H), 1.25 (s, 10H), 1.02-0.93 (m, J = 7.7, 6.6 Hz, 12H). <sup>13</sup>C NMR (176 MHz, Chloroform-d) δ 173.01, 149.53, 140.00, 124.05, 122.96, 117.01, 107.56, 106.0, 69.64, 68.87, 29.08, 22.56, 14.11, 9.03. HRMS: calc. m/z 740.42882 (C<sub>46</sub>H<sub>60</sub>O<sub>8</sub>), found m/z 740.42632 (M)<sup>+</sup>.

**3,6-diylidicyclobutanecarboxylate-2,7,10,11-tetrakis(pentyloxy)triphenylene (16).** FT-IR (cm<sup>-1</sup>): 2961, 2932, 2866, 1742, 1521, 1268, 1143. <sup>1</sup>H NMR (400 MHz, Chloroform-d) δ 8.02 (s, 2H), 7.84 (d, J = 9.3 Hz, 4H), 4.22 (dt, J = 16.4, 6.4 Hz, 8H), 3.56 – 3.40 (m, 2H), 2.67 – 2.30 (m, 8H), 2.19 – 1.82 (m, 12H), 1.56 – 1.37 (m, 16H), 0.97 (q, J = 7.2 Hz, 12H). <sup>13</sup>C NMR (176 MHz, Chloroform-d) δ 173.50, 149.65, 139.94, 127.67, 124.07, 122.92, 116.92, 107.60, 105.79, 69.65, 68.75, 38.03, 29.10, 28.34, 25.41, 22.58, 18.60, 14.11. HRMS: calc. m/z 768.46012 (C<sub>48</sub>H<sub>64</sub>O<sub>8</sub>), found m/z 768.46196 (M)<sup>+</sup>.

**3,6-diylidicyclopentanecarboxylate-2,7,10,11-tetrakis(pentyloxy)triphenylene (17).** FT-IR (cm<sup>-1</sup>): 2960, 2937, 2874, 1743, 1520, 1269, 1141. <sup>1</sup>H NMR (400 MHz, Chloroform-d) δ 8.03 (s, 2H), 7.83 (d, J = 12.1 Hz, 4H), 4.22 (dt, J = 18.4, 6.5 Hz, 8H), 3.10 (p, J = 8.0 Hz, 2H), 2.09 (ddd, J = 7.5, 4.9, 2.5 Hz, 8H), 1.95 (dd, J = 8.3, 6.5 Hz, 4H), 1.91 – 1.76 (m, 8H), 1.73 – 1.61 (m, 4H), 1.53 – 1.35 (m, 16H), 0.97 (td, J = 7.2, 6.1 Hz, 12H). <sup>13</sup>C NMR (176 MHz, Chloroform-d) δ 174.84, 149.49, 139.99, 124.08, 122.88, 116.93, 107.62, 105.67, 69.66, 68.70, 43.69, 30.15, 29.12, 28.35, 26.04, 22.59, 14.11. HRMS: calc. m/z 796.49142 (C<sub>50</sub>H<sub>68</sub>O<sub>8</sub>), found m/z 796.49188 (M)<sup>+</sup>.

**3,6-diylidicyclohexanecarboxylate-2,7,10,11-tetrakis(pentyloxy)triphenylene (18).** FT-IR (cm<sup>-1</sup>): 2962, 2936, 2858, 1743, 1521, 1268, 1035. <sup>1</sup>H NMR (400 MHz, Chloroform-d) δ 7.93 (s, 2H), 7.76 (d, J = 12.6 Hz, 4H), 4.16 (dd, J = 16.3, 9.6 Hz, 8H), 2.60 (tt, J = 11.1, 3.7 Hz, 2H), 2.12 – 2.05 (m, 4H), 1.89 (q, J = 7.1 Hz, 4H), 1.84 – 1.75 (m, 10H), 1.69 – 1.58 (m, 6H), 1.55 – 1.22 (m, 20H), 0.95 – 0.88 (m, 12H). <sup>13</sup>C NMR (176 MHz, Chloroform-d) δ 174.12, 149.50, 139.96, 127.61, 124.07, 116.95, 107.62, 105.68, 69.66, 68.72, 43.18, 29.15, 28.36, 25.86, 25.48, 22.59, 14.11. HRMS: calc. m/z 824.52272 (C<sub>52</sub>H<sub>72</sub>O<sub>8</sub>), found m/z 824.52078 (M)<sup>+</sup>.

**3,6-diylbis(furan-2-carboxylate)-2,7,10,11-tetrakis(pentyloxy)triphenylene (19).** FT-IR (cm<sup>-1</sup>): 2960, 2938, 2866, 1745, 1519, 1268, 1174. <sup>1</sup>H NMR (400 MHz, Chloroform-d) δ 8.17 (s, 2H), 7.88 (d, J = 8.3 Hz, 4H), 7.44 (dd, J = 3.5, 0.9 Hz, 2H), 6.62 (dd, J = 3.5, 1.8 Hz, 2H), 4.24 (dt, J = 11.9, 6.4 Hz, 8H), 1.89 (dt, J = 59.4, 7.3 Hz, 8H), 1.52 – 1.32 (m, 16H), 0.92 (dt, J = 49.7, 7.2 Hz, 12H). <sup>13</sup>C NMR (176 MHz, Chloroform-d) δ 156.60, 149.49, 147.01, 144.17, 139.31, 127.94, 123.96, 122.79, 119.25, 116.77, 112.11, 107.49, 106.32, 69.51, 68.97, 29.14, 28.94, 28.29, 22.62, 22.45, 14.14, 14.00. HRMS: calc. m/z 792.38735 (C<sub>48</sub>H<sub>56</sub>O<sub>10</sub>), found m/z 792.38423 (M)<sup>+</sup>.

**3,6-diylbis(adamantane-1-carboxylate)-2,7,10,11-tetrakis(pentyloxy)triphenylene (20).** FT-IR (cm<sup>-1</sup>): 2955, 2910, 2860, 1740, 1520, 1270, 1060. <sup>1</sup>H NMR (400 MHz, Chloroform-d) δ 7.99 (s, 2H), 7.82 (d, J = 18.6 Hz, 4H), 4.21 (dt, J = 23.5, 6.4 Hz, 8H), 2.22 – 2.07 (m, 18H), 2.00 – 1.78 (m, 20H), 1.57 – 1.37 (m, 16H), 0.97 (td, J = 7.2, 4.3 Hz, 12H). <sup>13</sup>C NMR (176 MHz, Chloroform-d) δ 175.68, 149.67, 140.14, 127.53, 124.12, 117.01, 107.68, 105.54, 69.70, 68.64, 41.10, 39.02, 36.61, 29.15, 28.38, 28.06, 22.62, 14.12. HRMS: calc. m/z 928.58532 (C<sub>60</sub>H<sub>80</sub>O<sub>8</sub>), found m/z 928.58408 (M)<sup>+</sup>.



#### S4. Supplementary FT-IR results

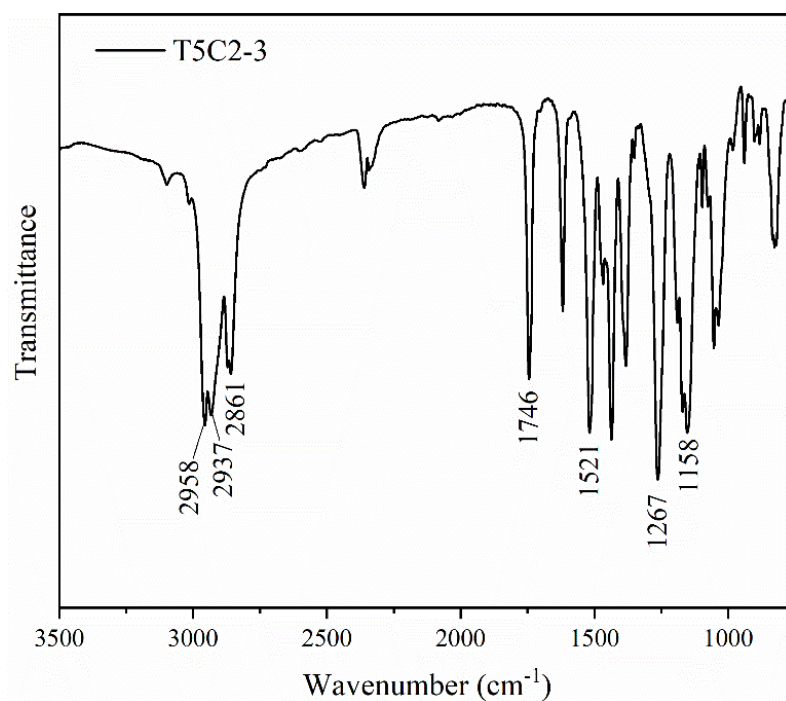

**Fig. S1.** FT-IR spectrum of Compounds T5C2-3

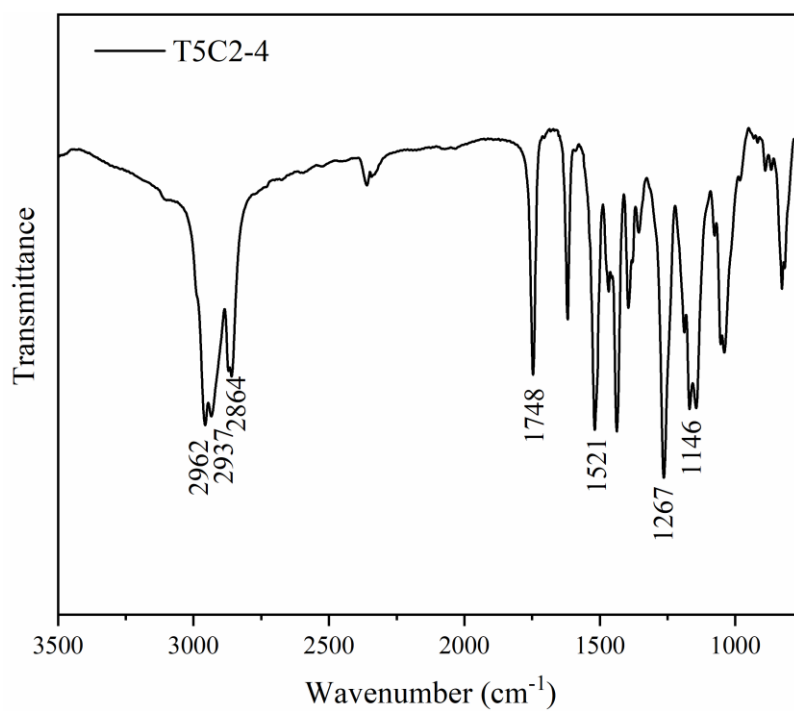

**Fig. S2.** FT-IR spectrum of Compounds T5C2-4

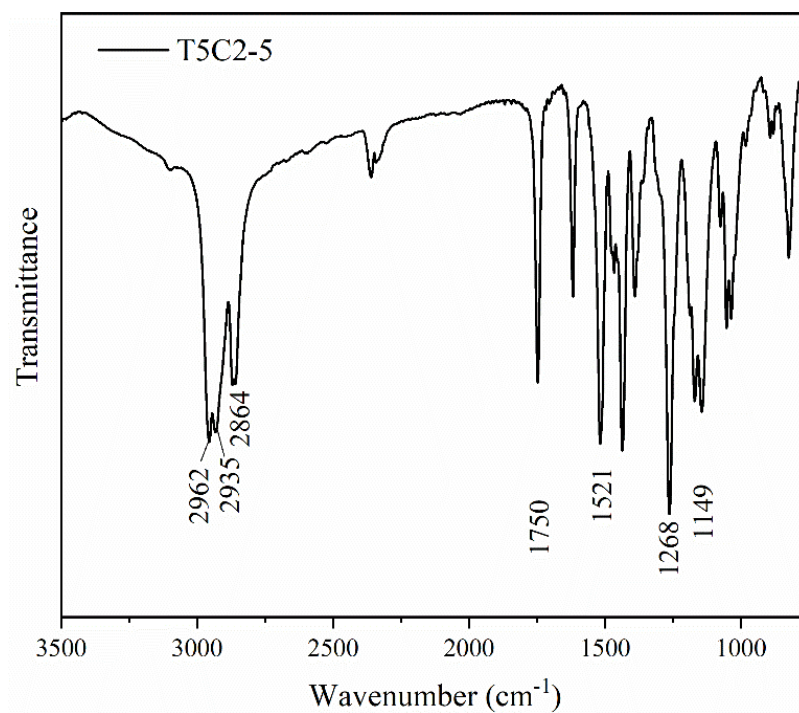

**Fig. S3.** FT-IR spectrum of Compounds T5C2-5

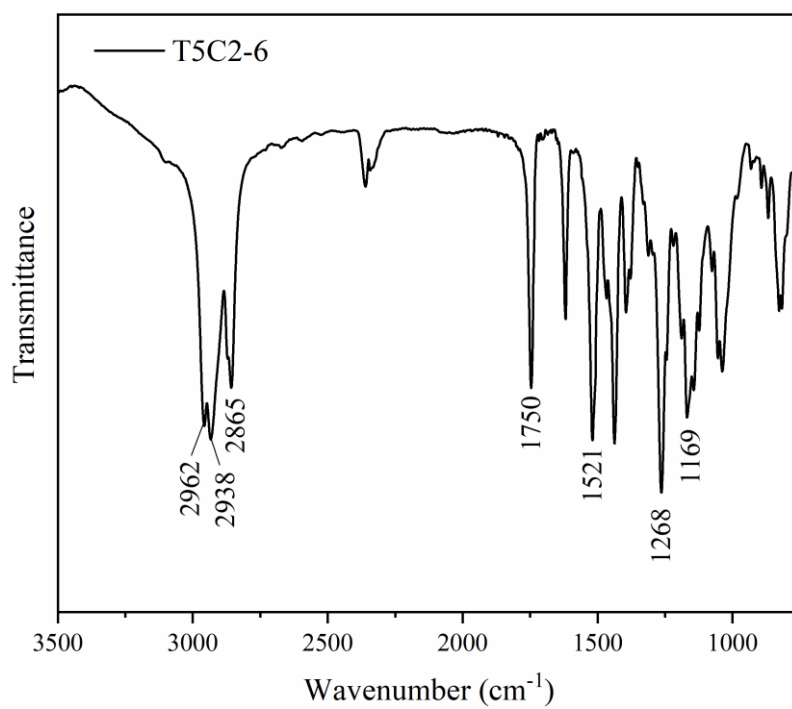

**Fig. S4.** FT-IR spectrum of Compounds T5C2-6

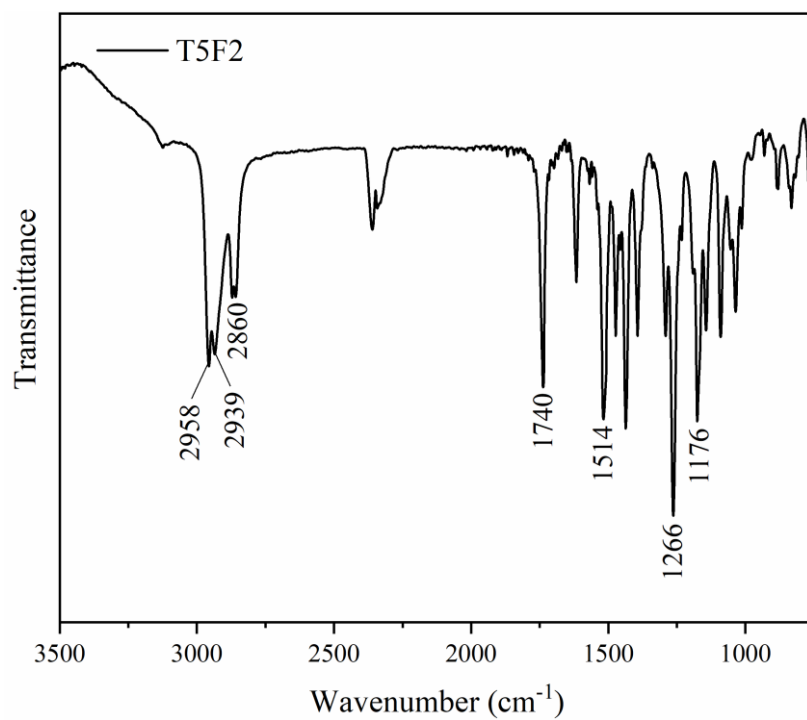

**Fig. S5.** FT-IR spectrum of Compounds T5F2

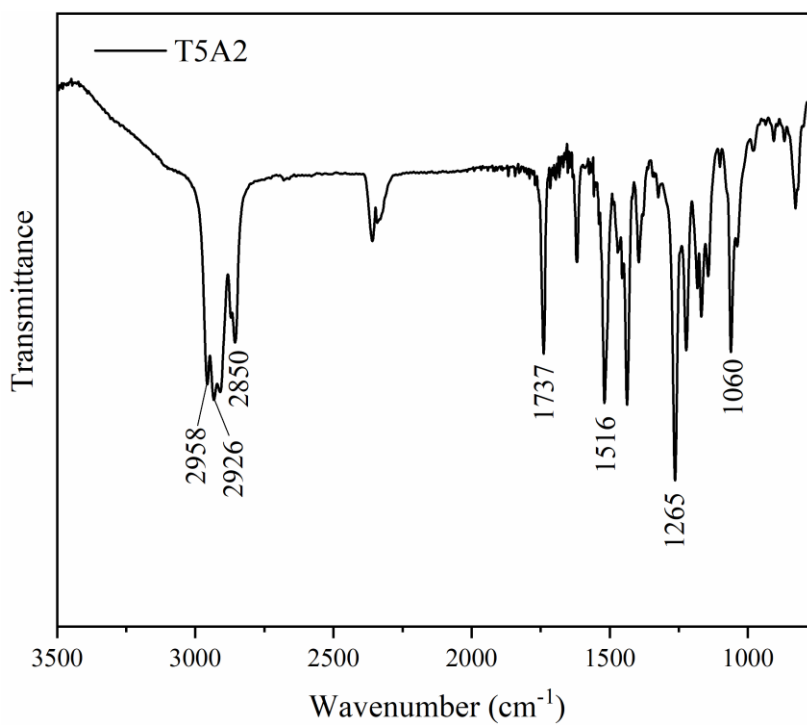

**Fig. S6.** FT-IR spectrum of Compounds T5A2

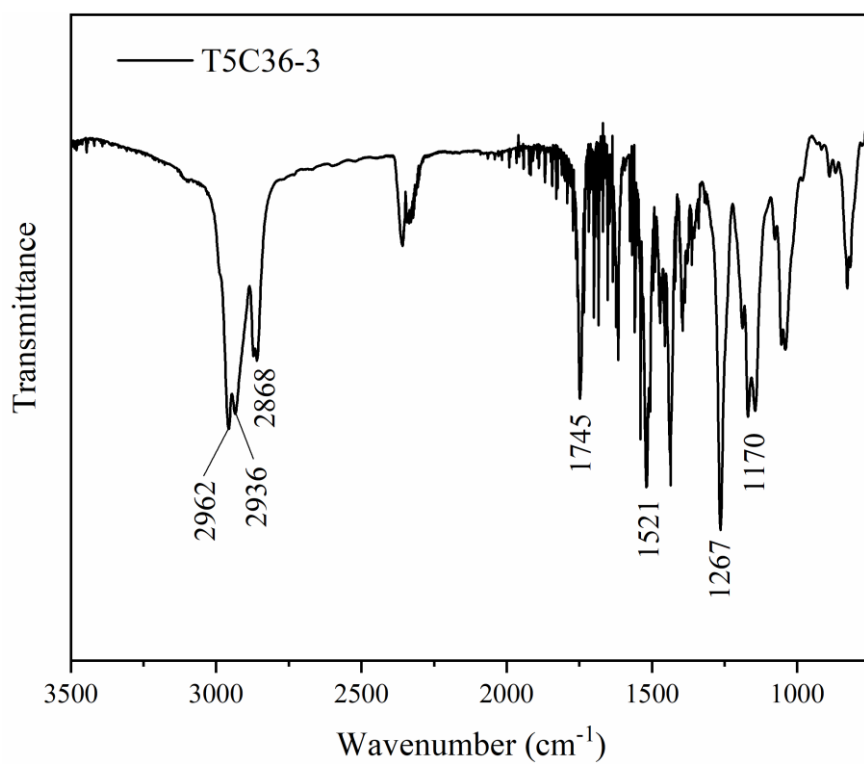

**Fig. S7.** FT-IR spectrum of Compounds T5C36-3

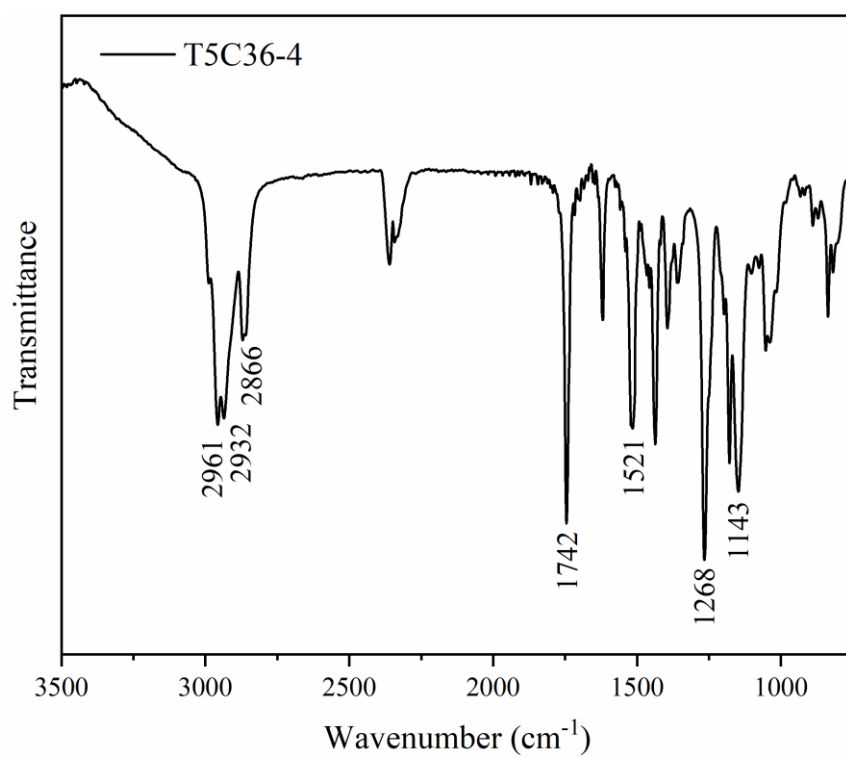

**Fig. S8.** FT-IR spectrum of Compounds T5C36-4

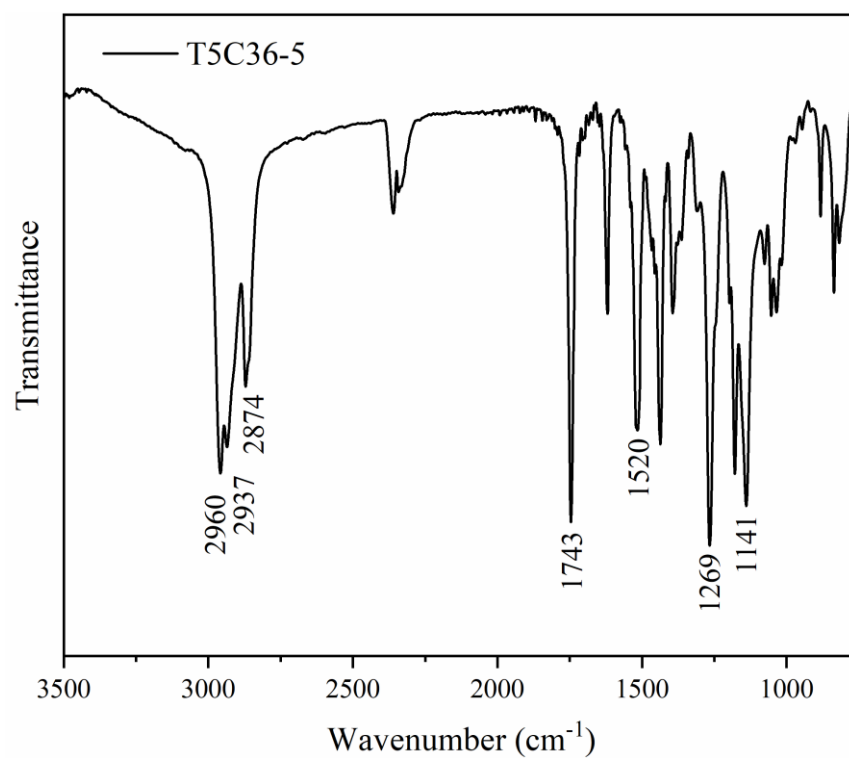

**Fig. S9.** FT-IR spectrum of Compounds T5C36-5

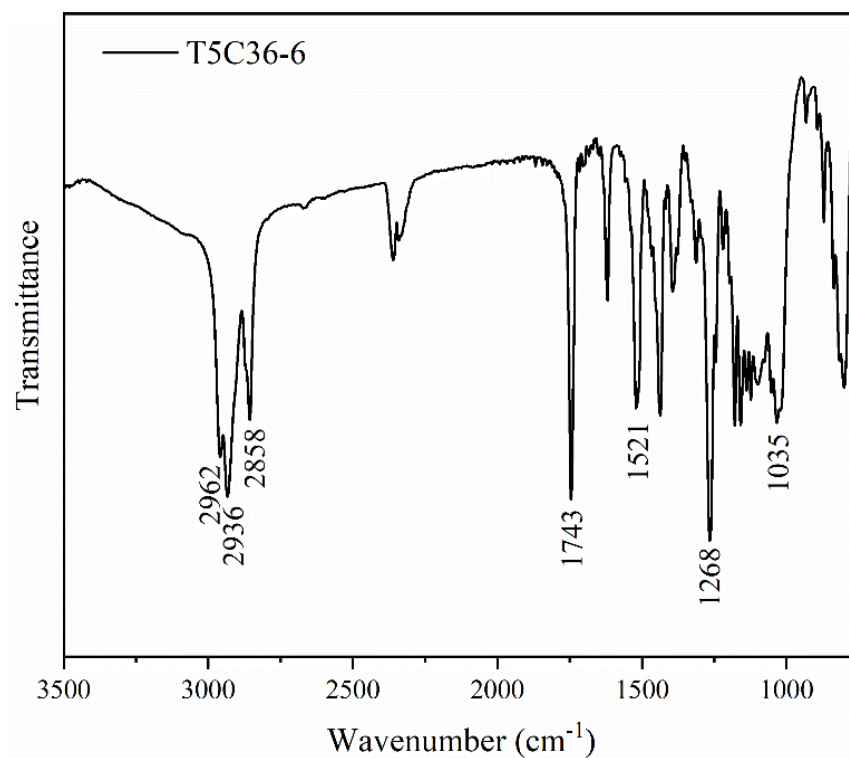

**Fig. S10.** FT-IR spectrum of Compounds T5C36-6

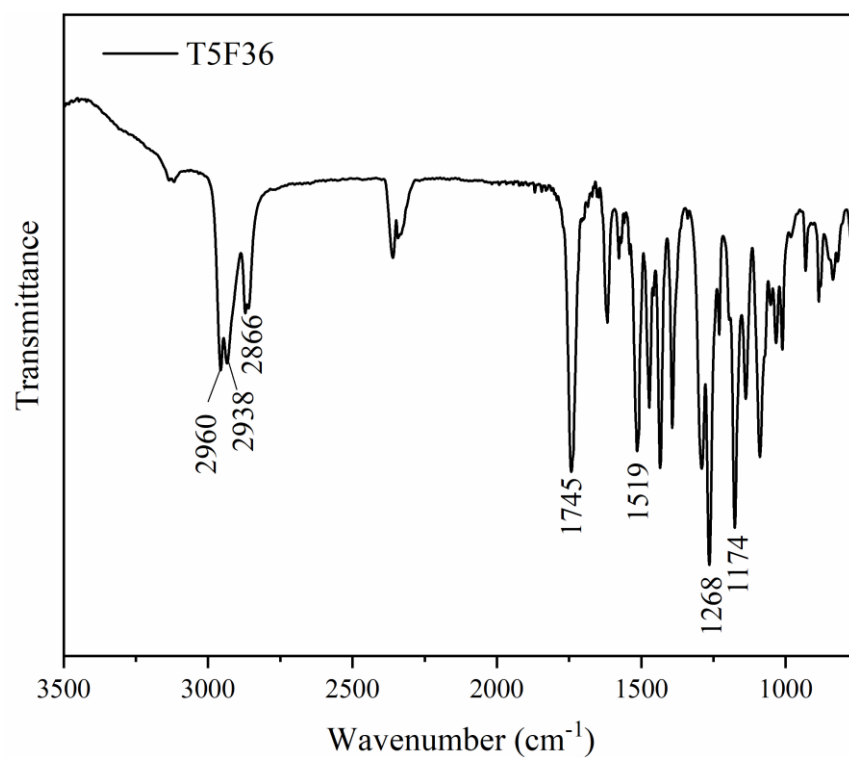

**Fig. S11.** FT-IR spectrum of Compounds T5F36

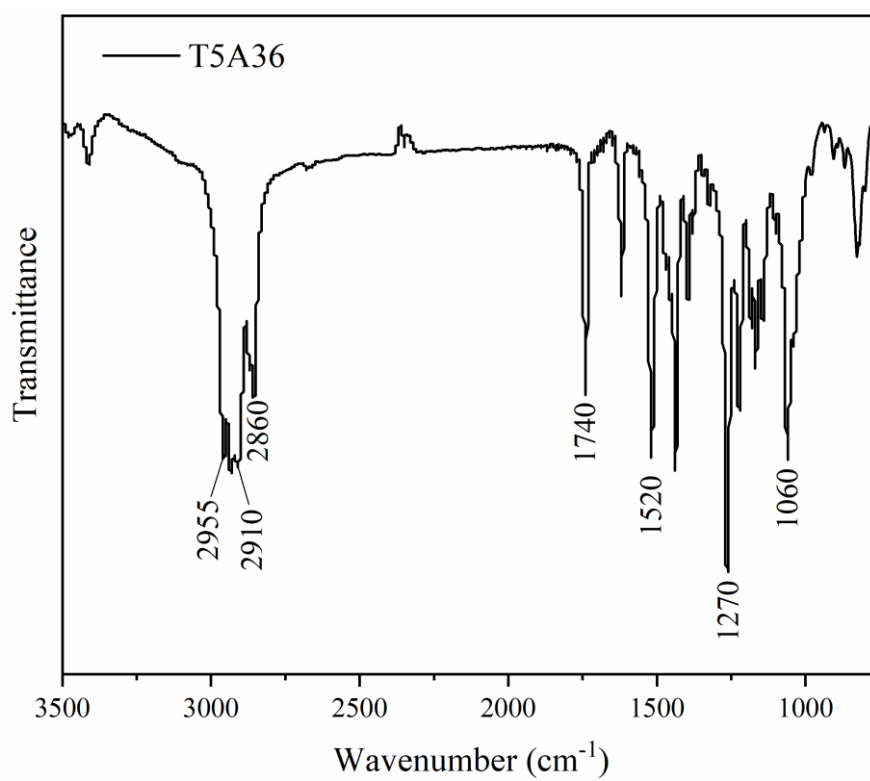

**Fig. S12.** FT-IR spectrum of Compound T5A36

## S5. Supplementary <sup>1</sup>H NMR results

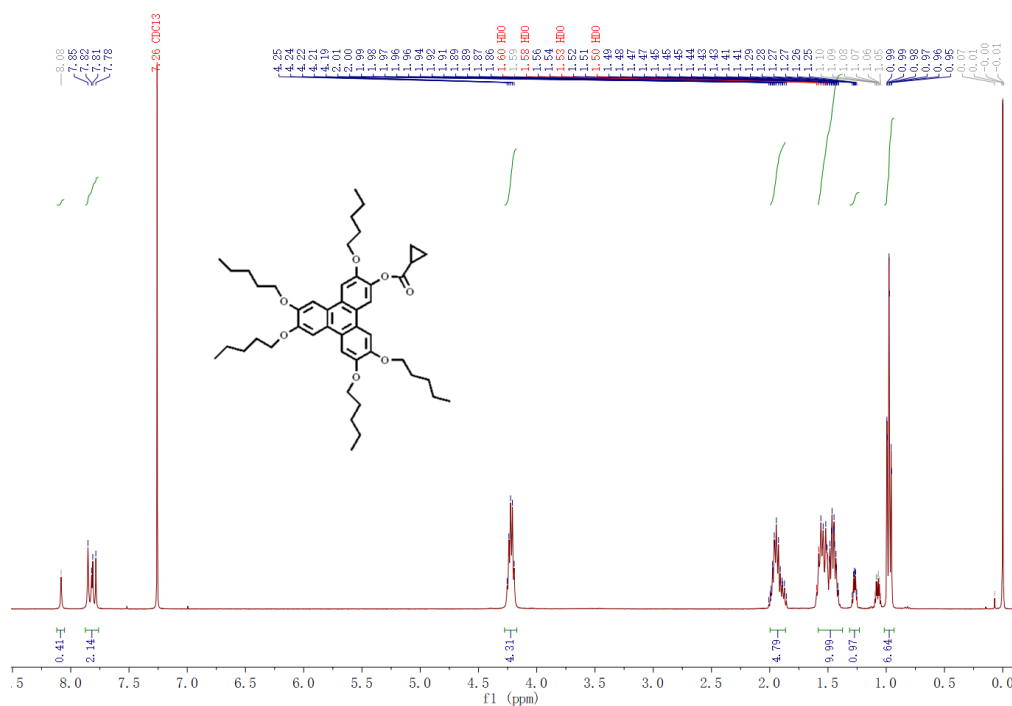

**Fig. S13.**  $^1\text{H}$  NMR spectrum of Compound T5C2-3

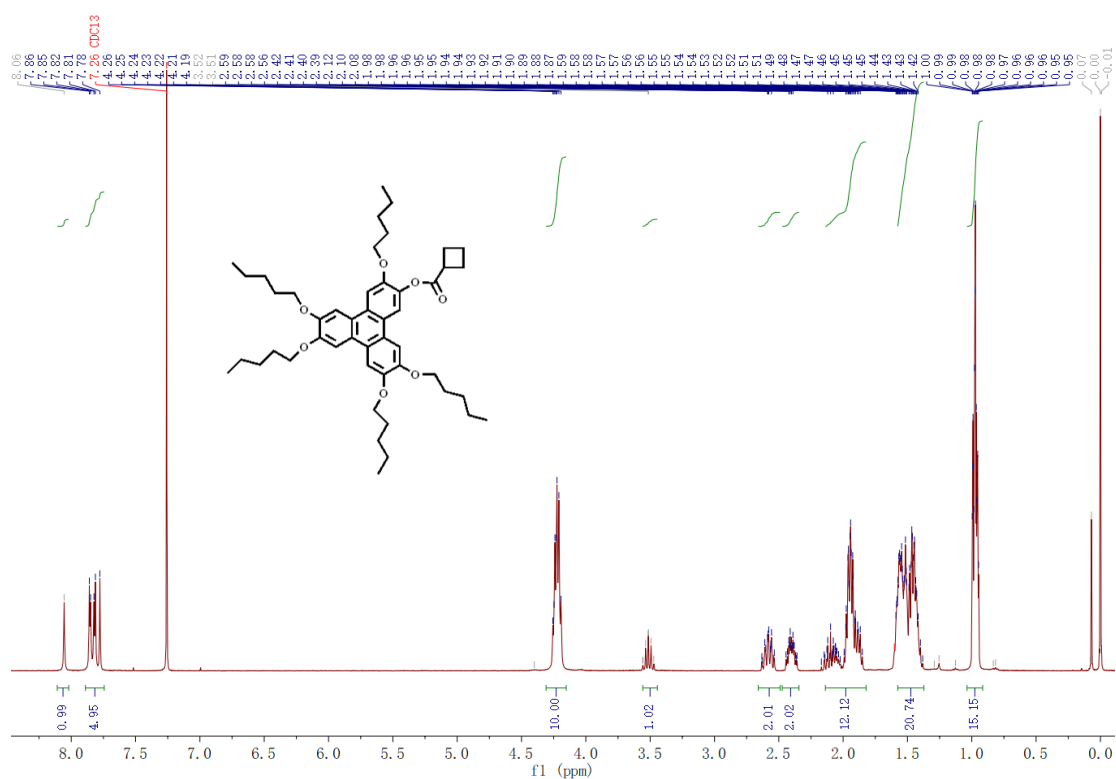

**Fig. S14.**  $^1\text{H}$  NMR spectrum of Compound T5C2-4

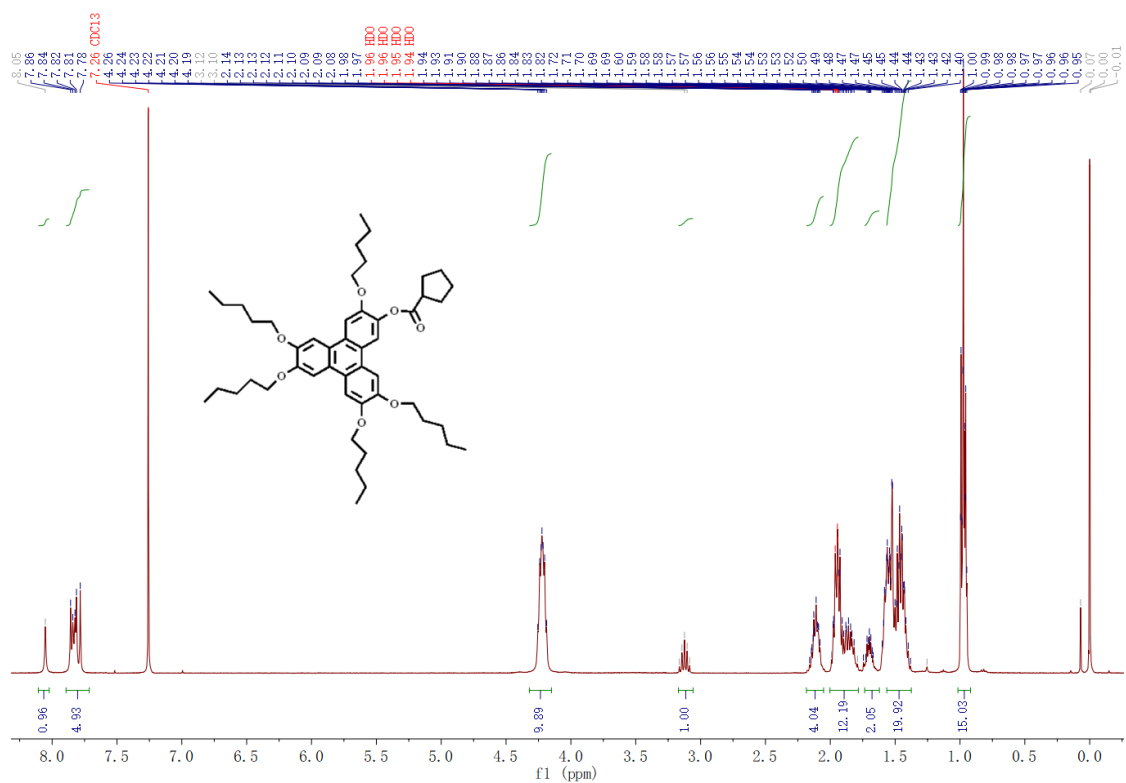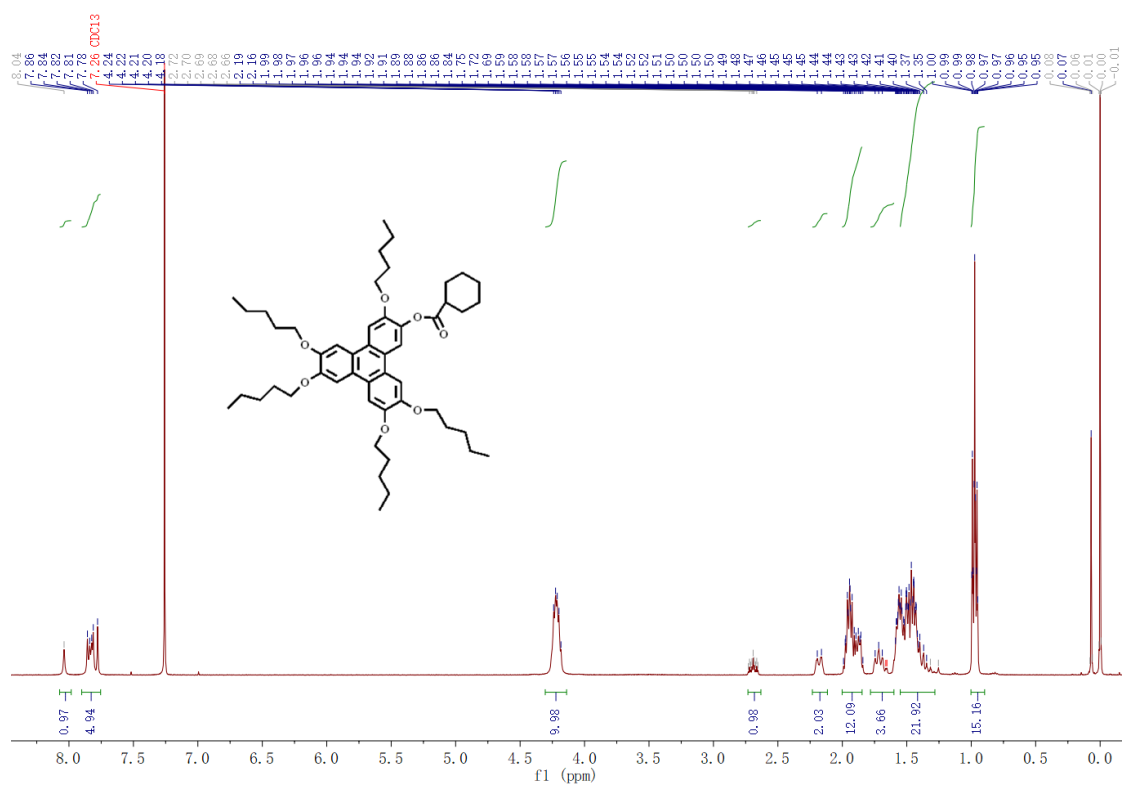



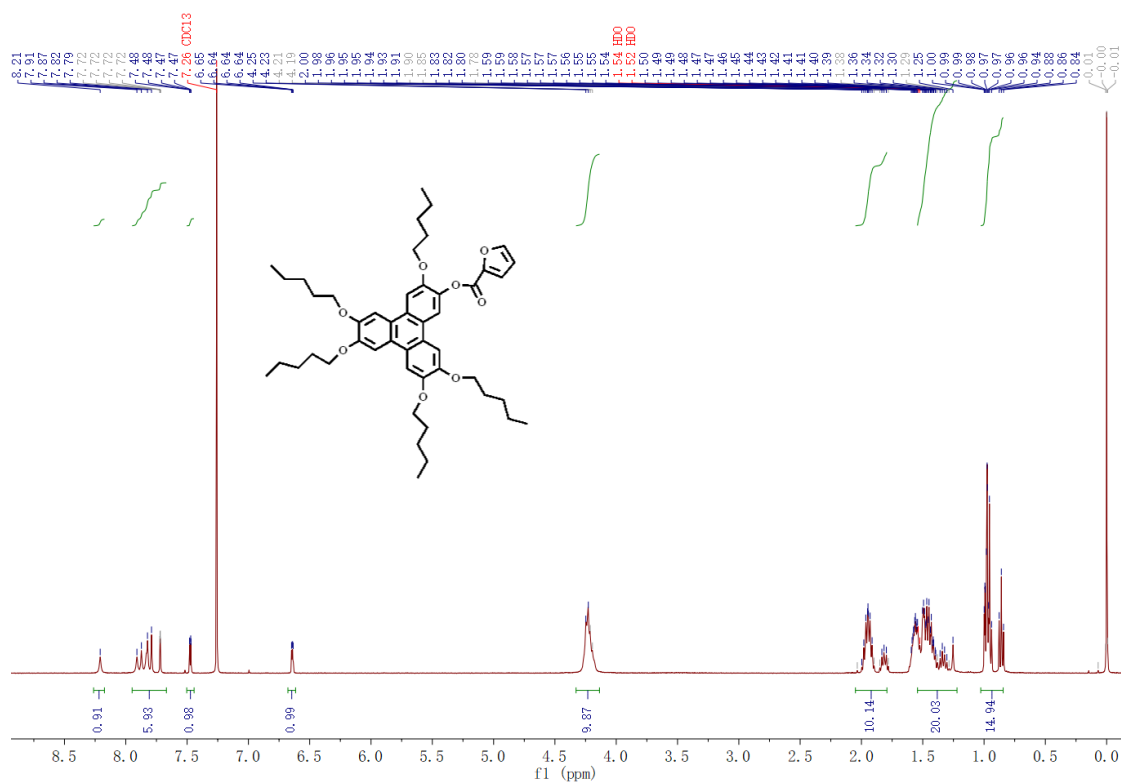

**Fig. S17.** <sup>1</sup>H NMR spectrum of Compound T5F2

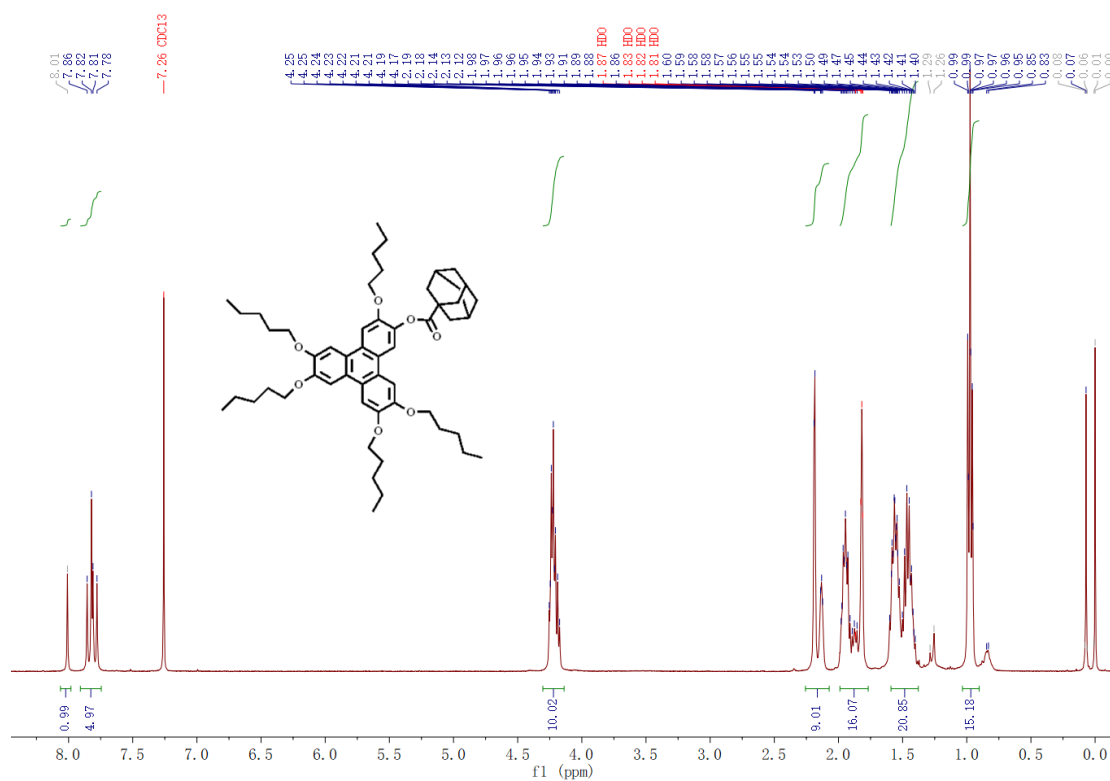

**Fig. S18.** <sup>1</sup>H NMR spectrum of Compound T5A2



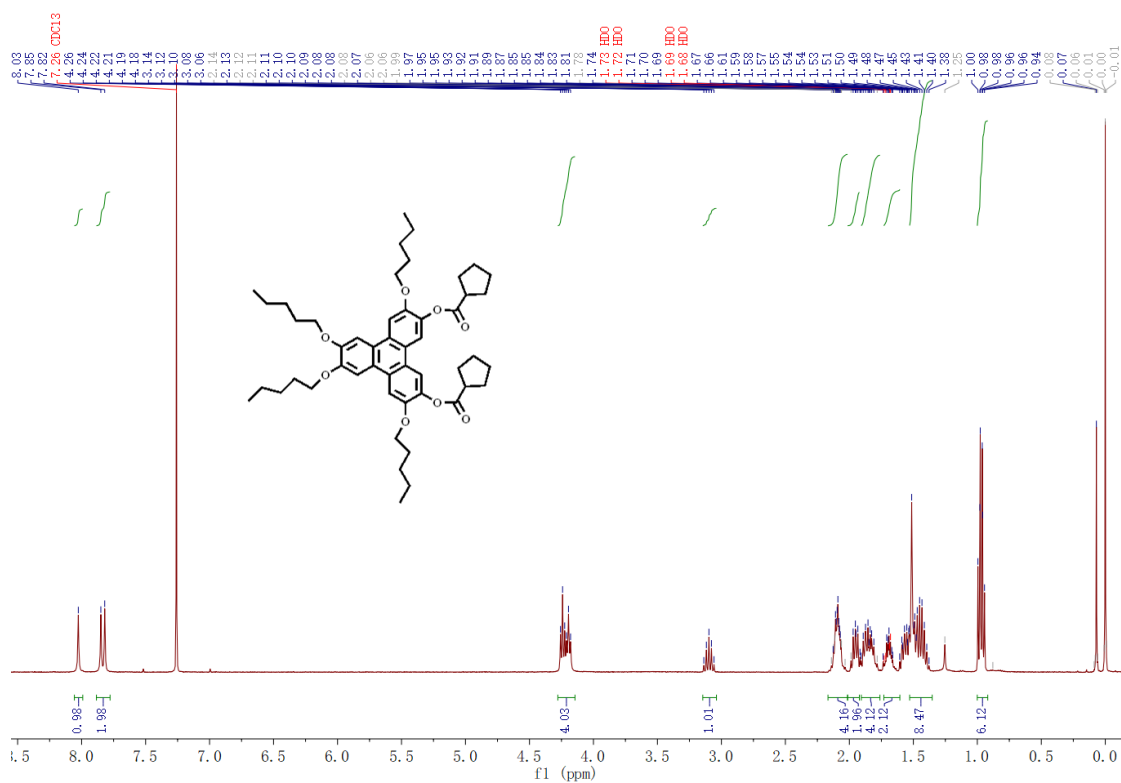

Fig. S21. <sup>1</sup>H NMR spectrum of Compound T5C36-5

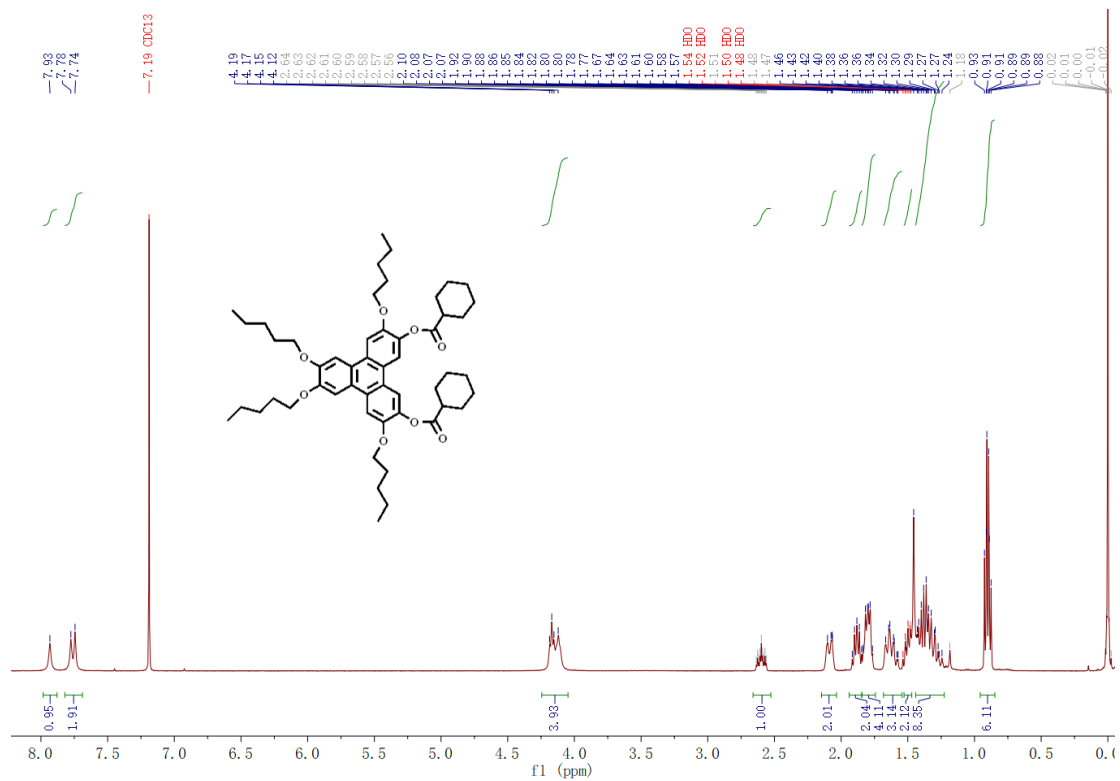

Fig. S22. <sup>1</sup>H NMR spectrum of Compound T5C36-6

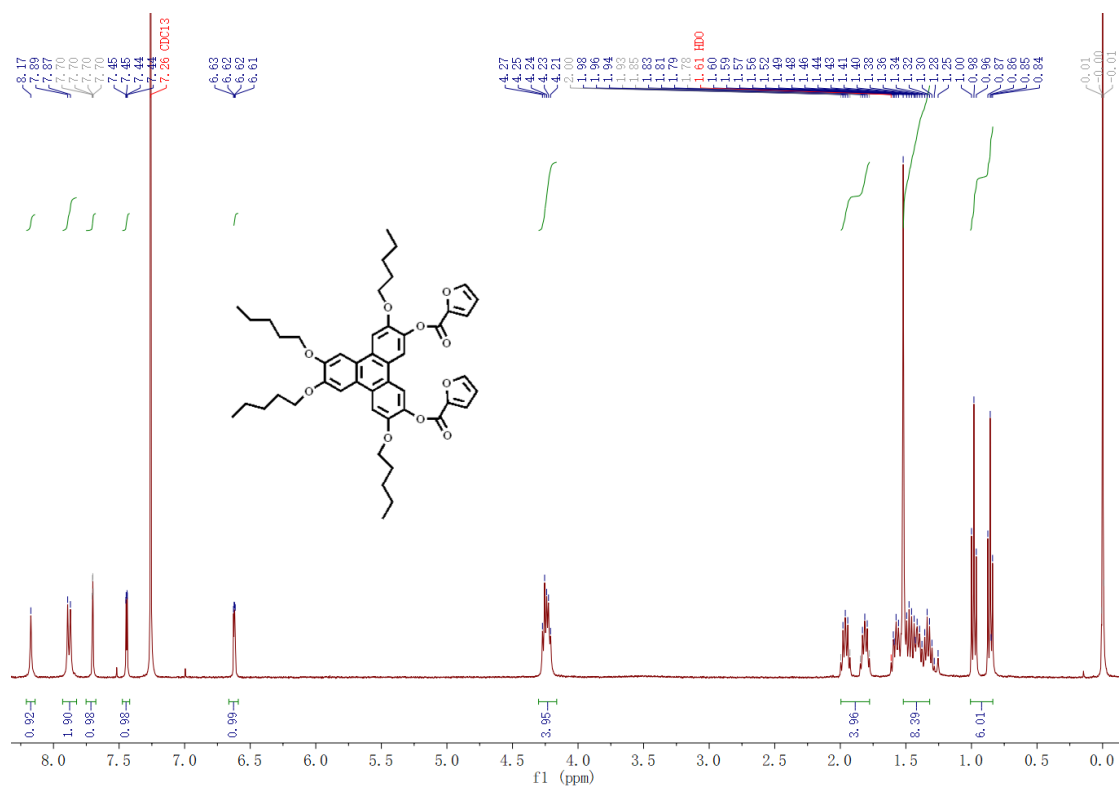

**Fig. S23.** <sup>1</sup>H NMR spectrum of Compound T5F36

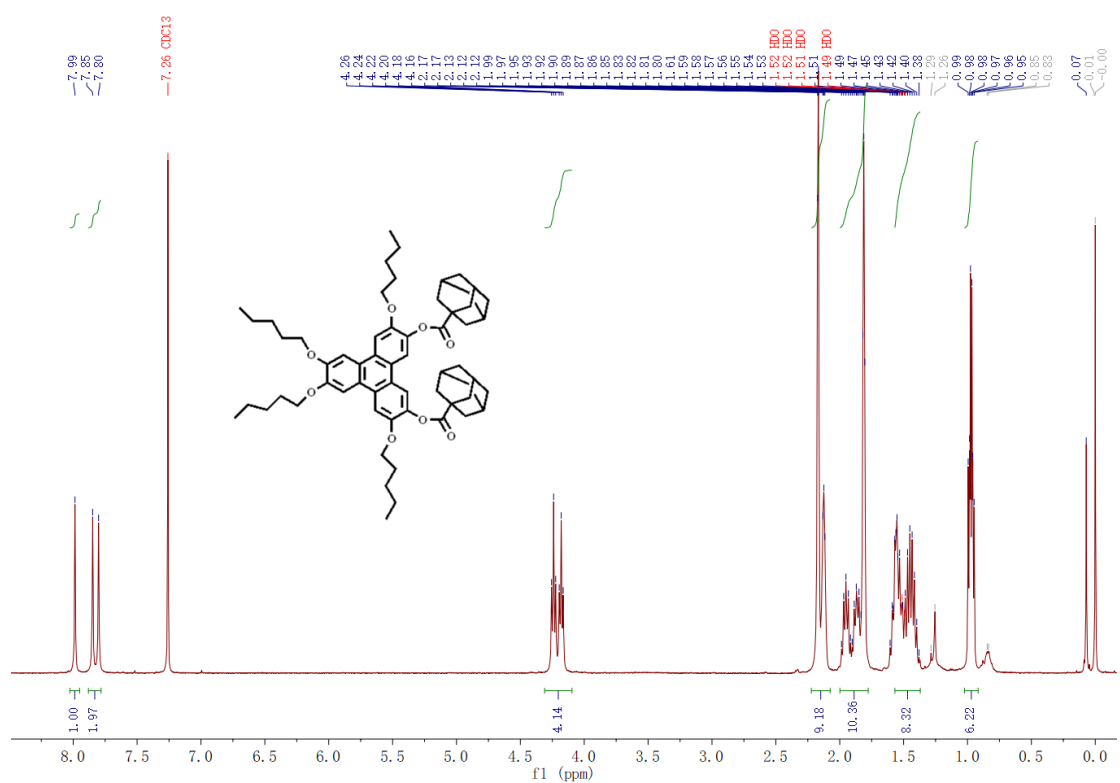

**Fig. S24.** <sup>1</sup>H NMR spectrum of Compound T5A36

## S6. Supplementary $^{13}\text{C}$ NMR results

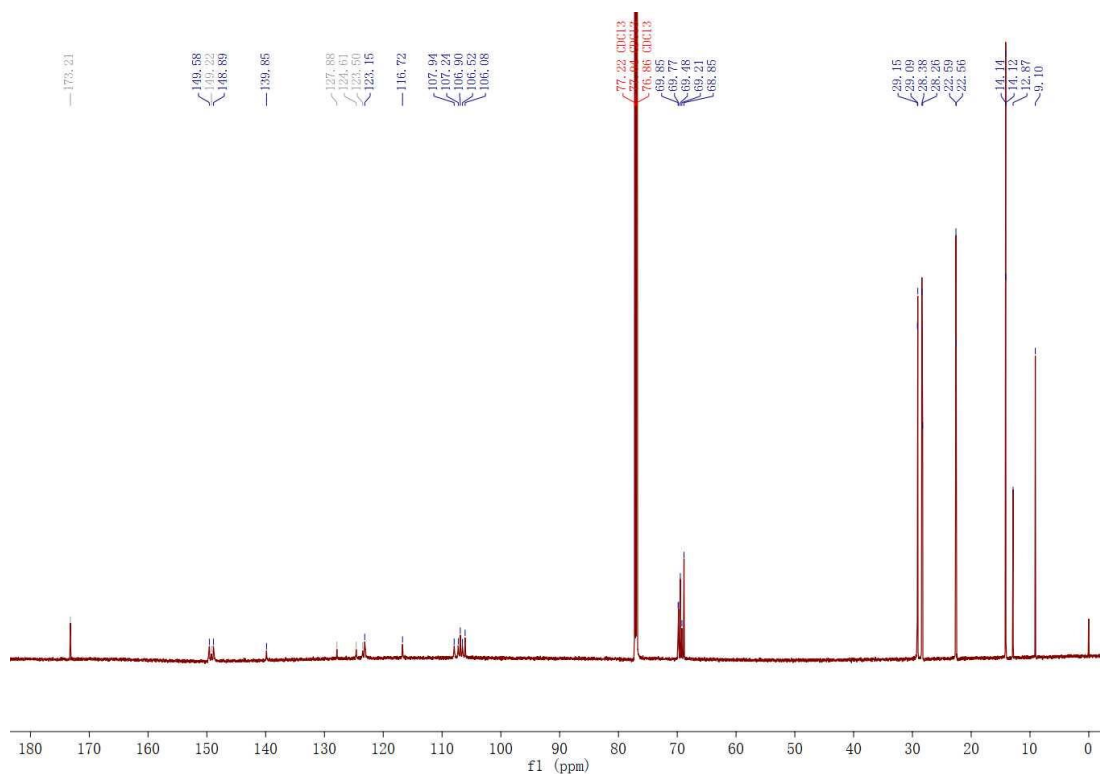

**Fig. S25.**  $^{13}\text{C}$  NMR spectrum of Compound T5C2-3

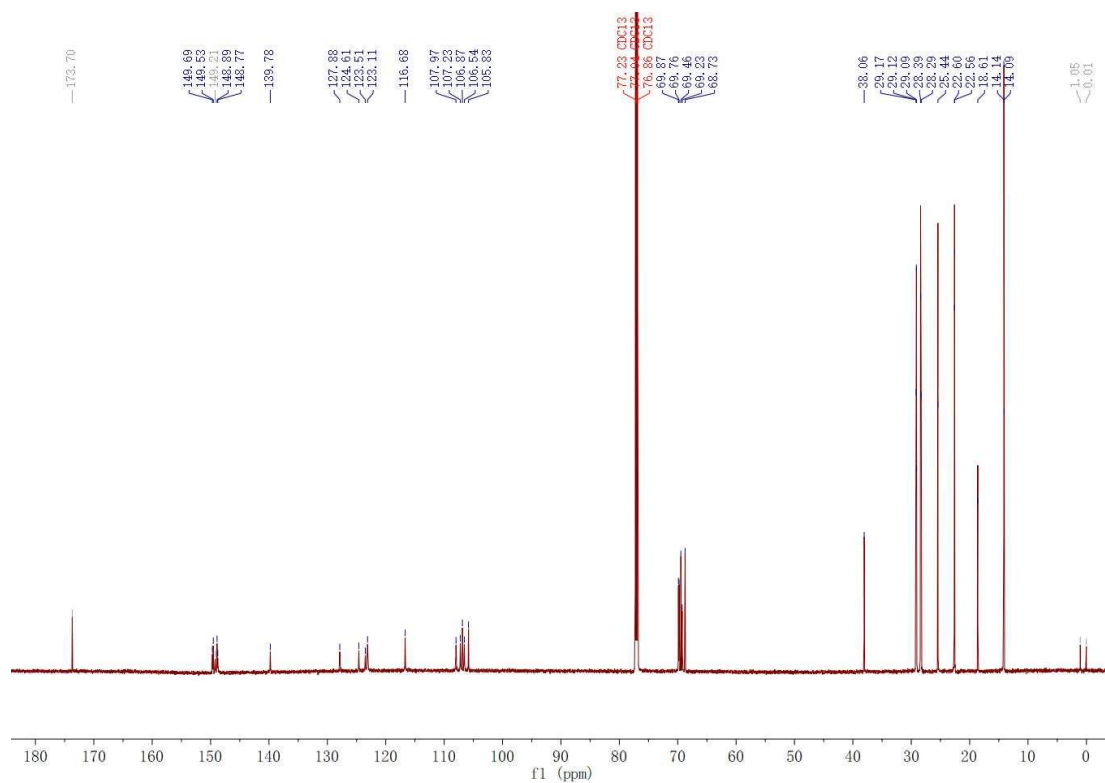

**Fig. S26.**  $^{13}\text{C}$  NMR spectrum of Compound T5C2-4

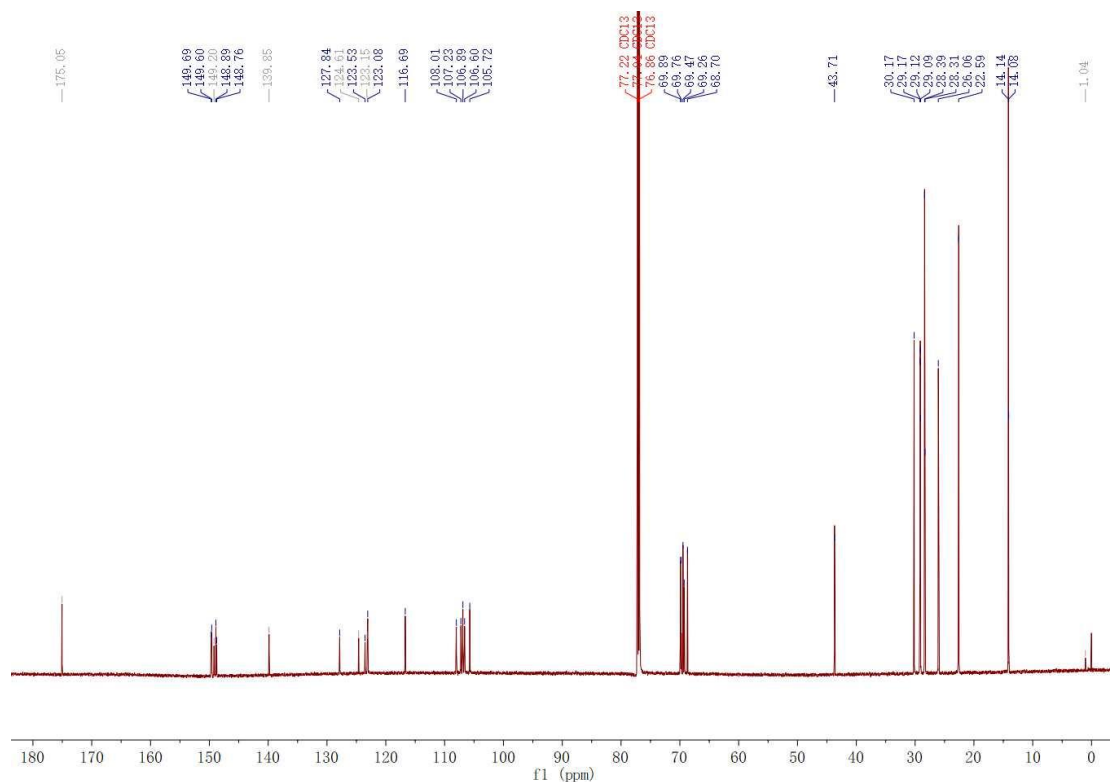

Fig. S27. <sup>13</sup>C NMR spectrum of Compound T5C2-5

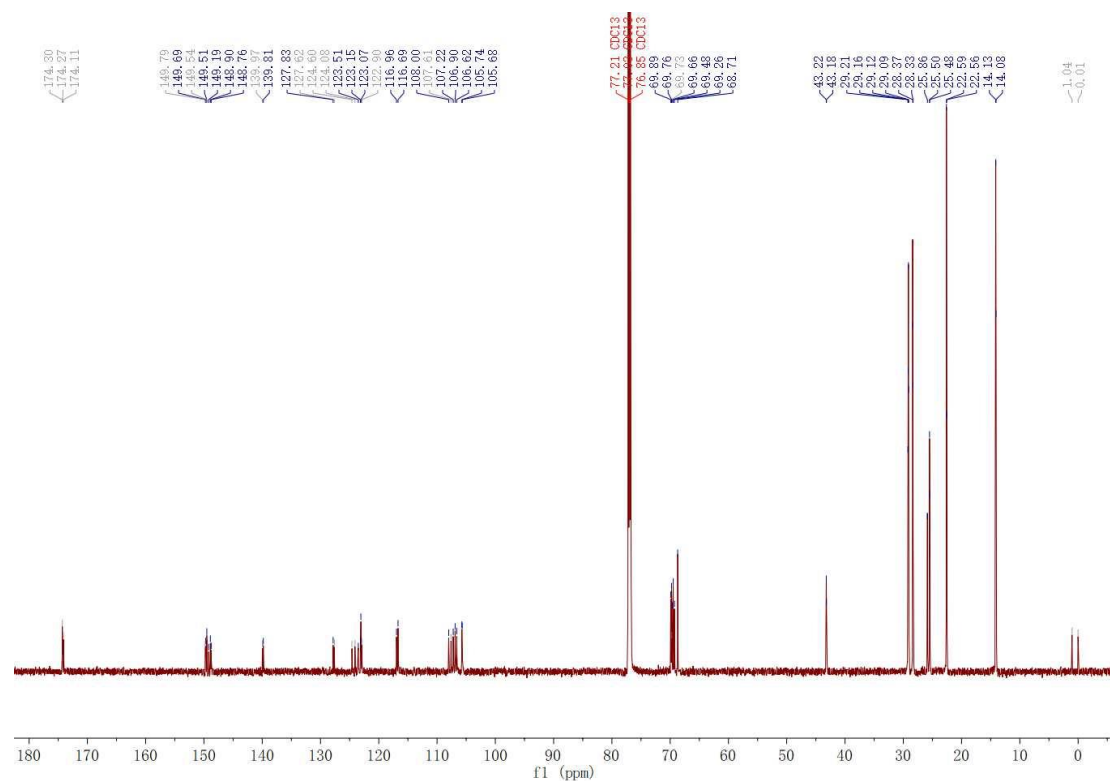

Fig. S28. <sup>13</sup>C NMR spectrum of Compound T5C2-6

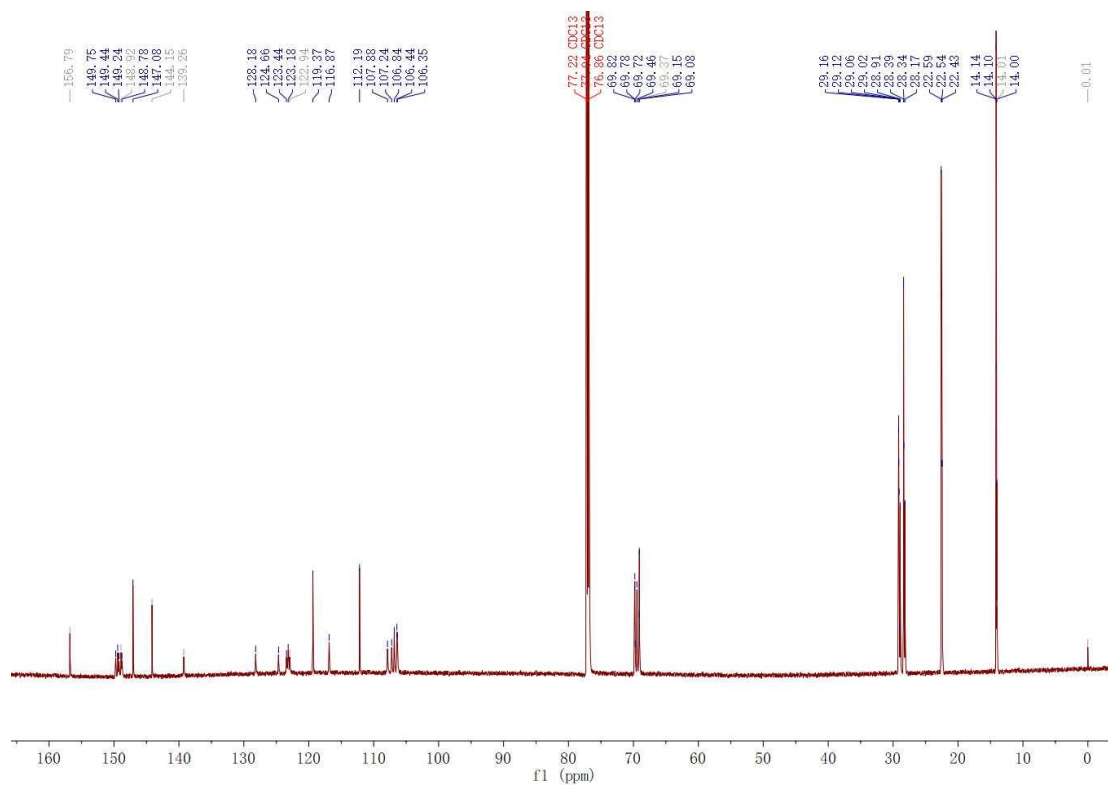

Fig. S29. <sup>13</sup>C NMR spectrum of Compound T5F2

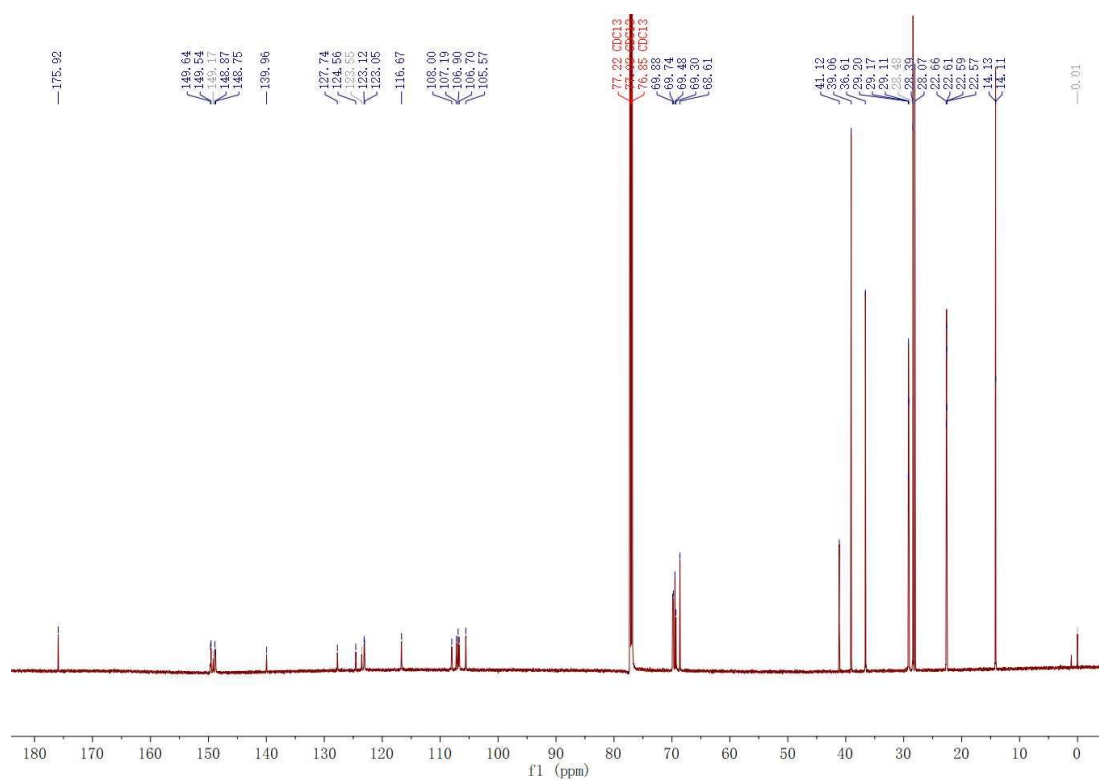

Fig. S30. <sup>13</sup>C NMR spectrum of Compound T5A2

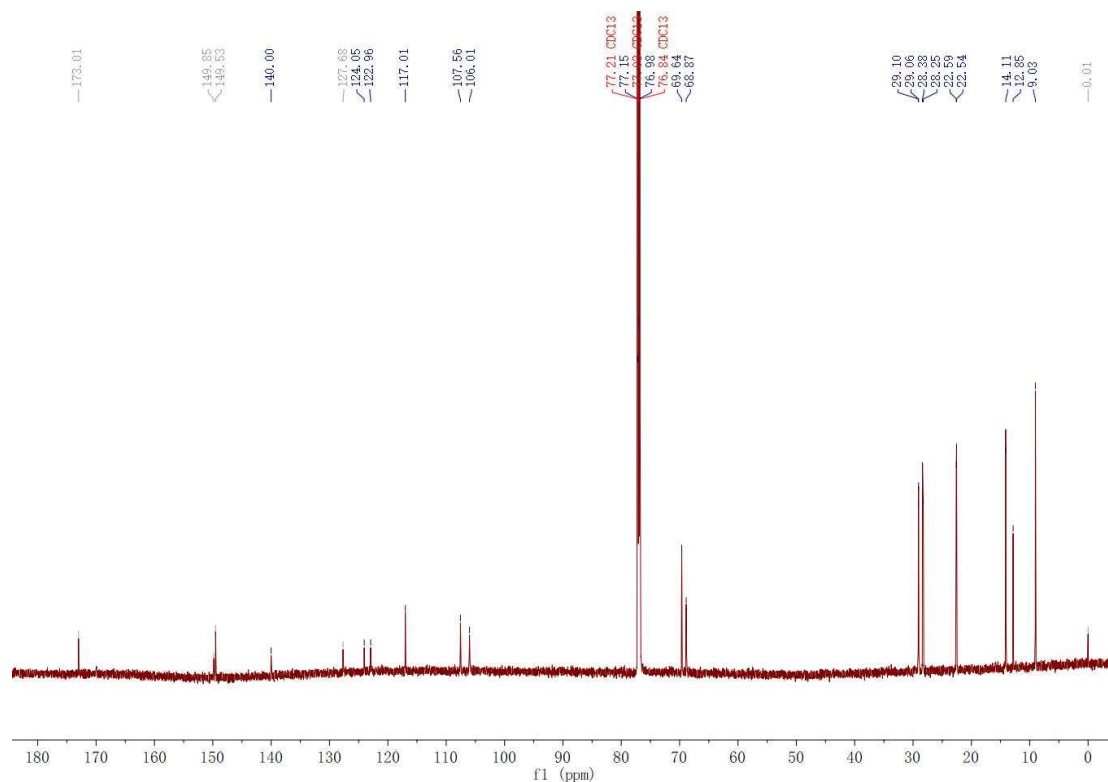

**Fig. S31.** <sup>13</sup>C NMR spectrum of Compound T5C36-3

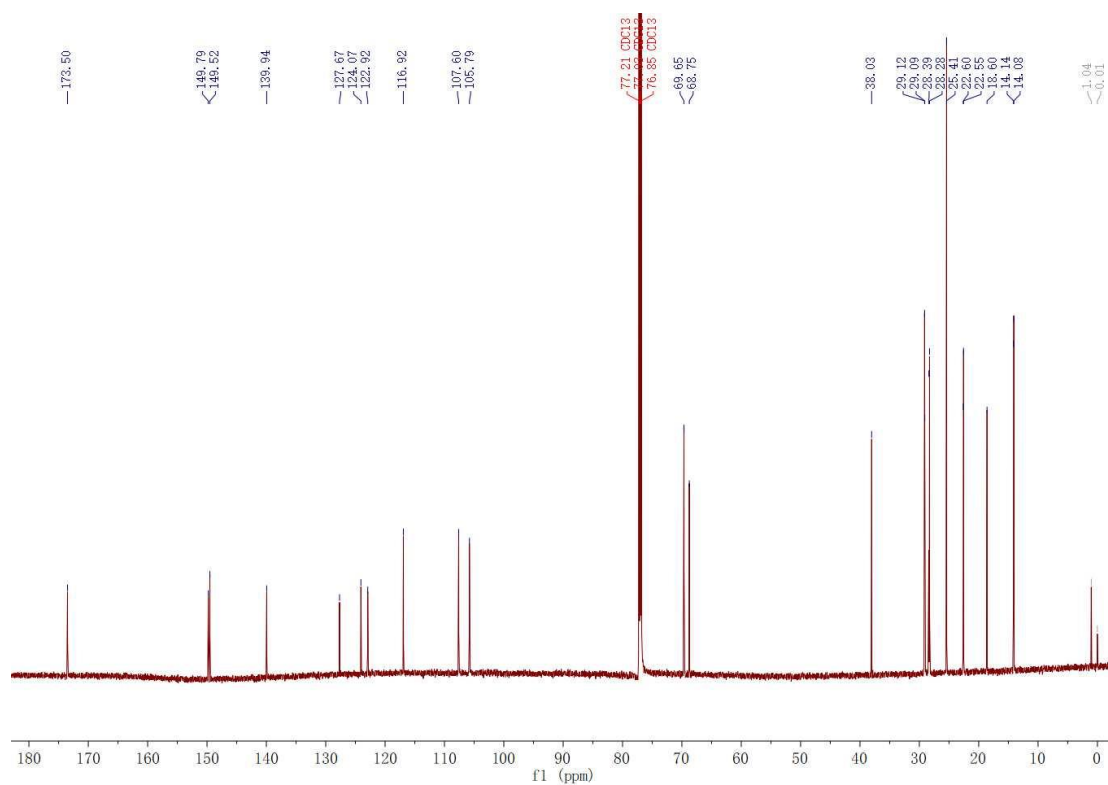

**Fig. S32.** <sup>13</sup>C NMR spectrum of Compound T5C36-4



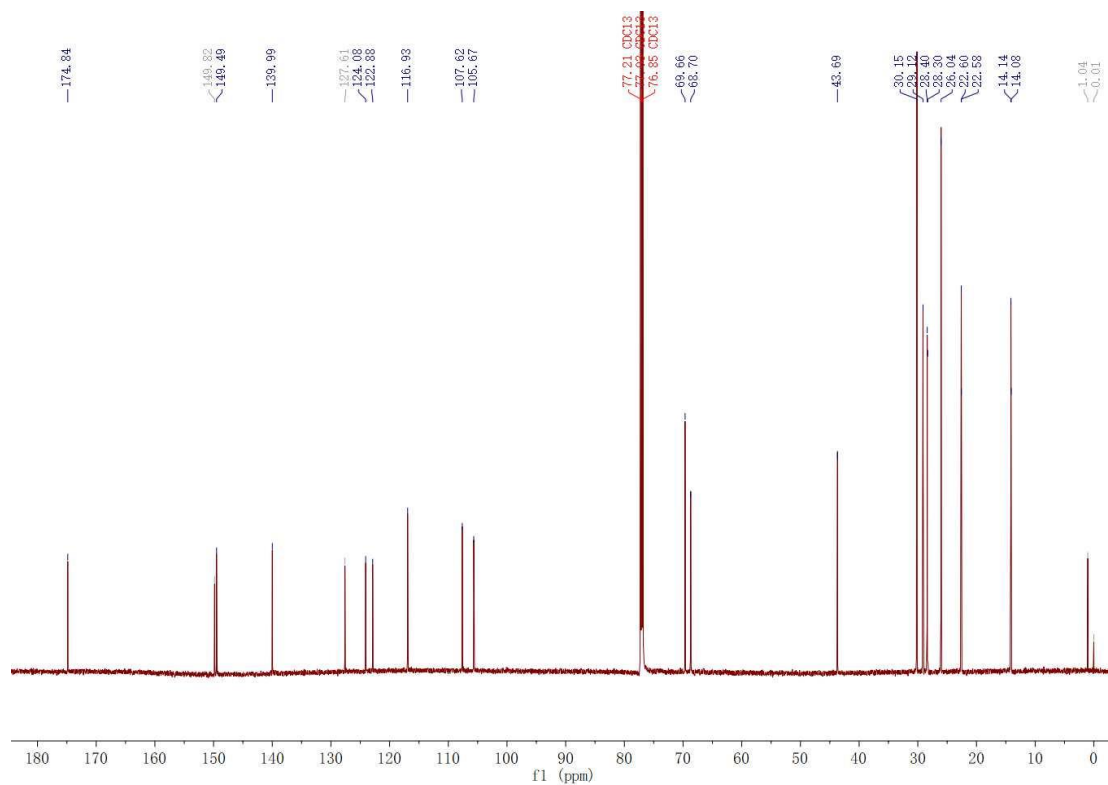

Fig. S33. <sup>13</sup>C NMR spectrum of Compound T5C36-5

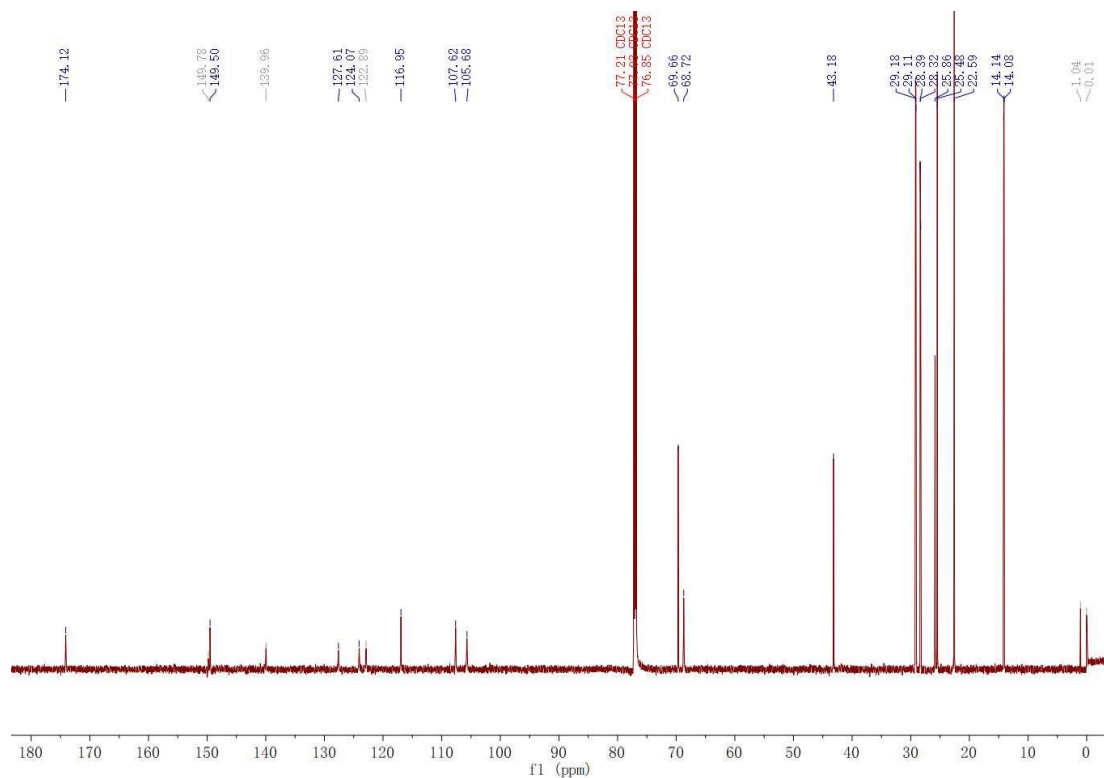

Fig. S34. <sup>13</sup>C NMR spectrum of Compound T5C36-6

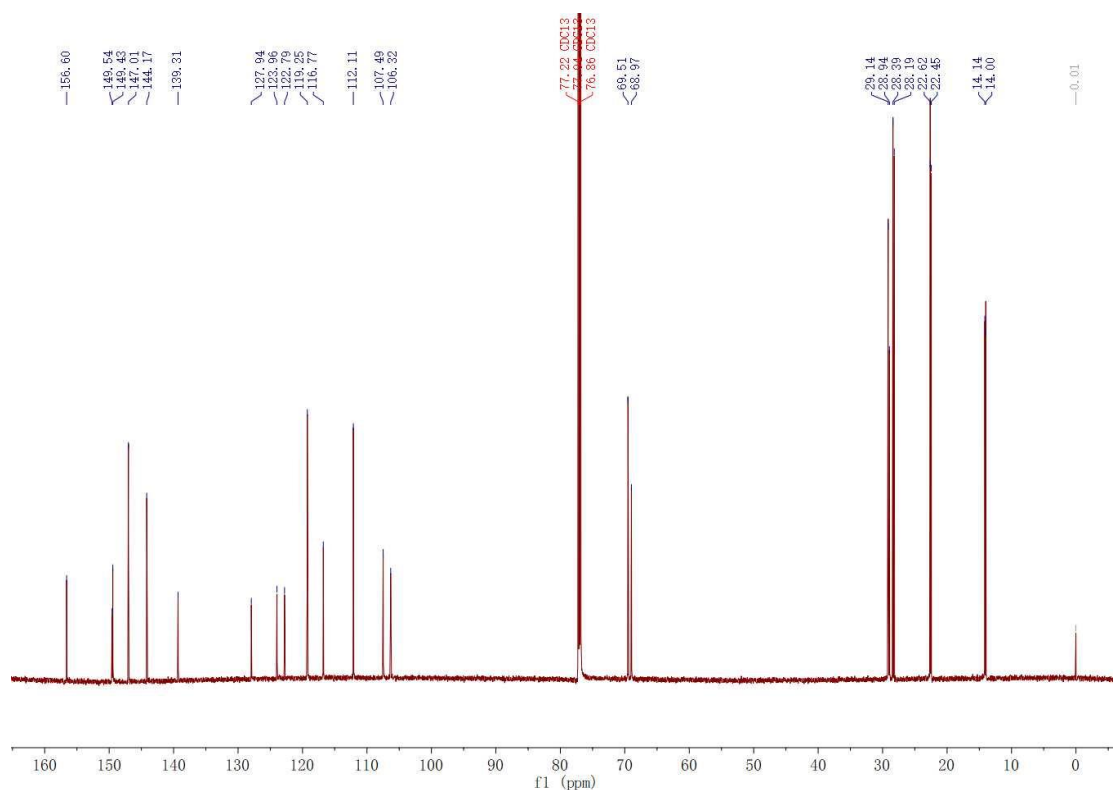

**Fig. S35.** <sup>13</sup>C NMR spectrum of Compound T5F36

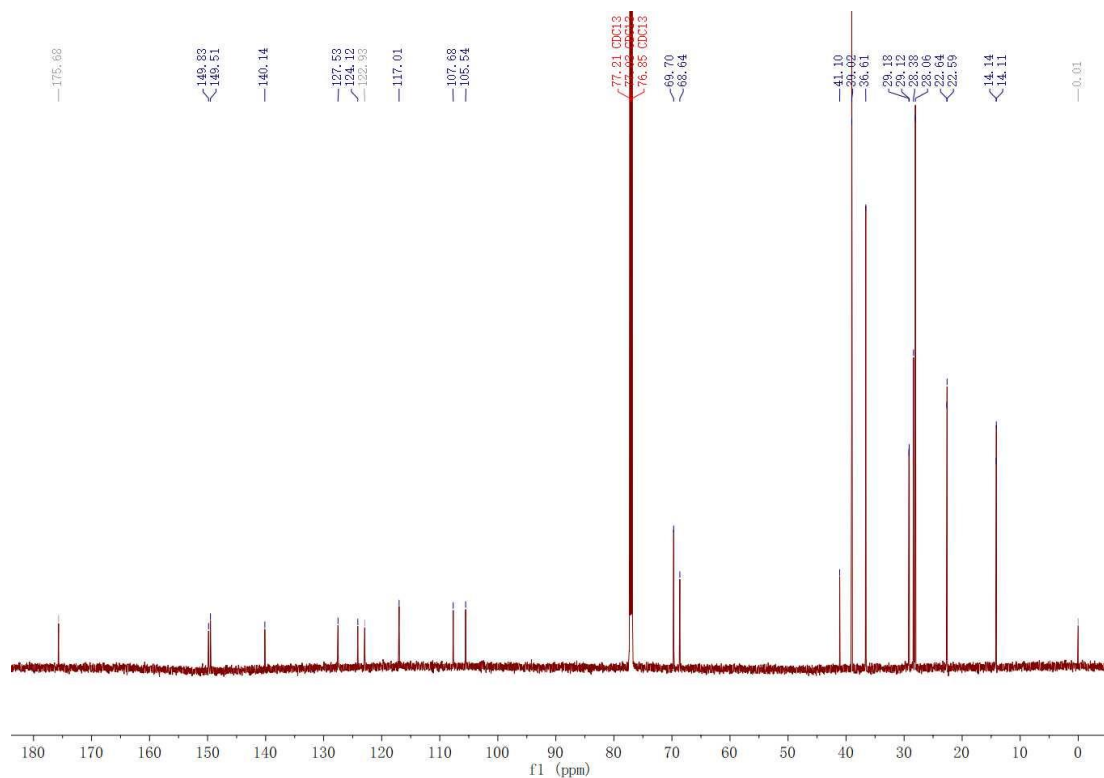

**Fig. S36.** <sup>13</sup>C NMR spectrum of Compound T5A36

## S7. Supplementary MS results

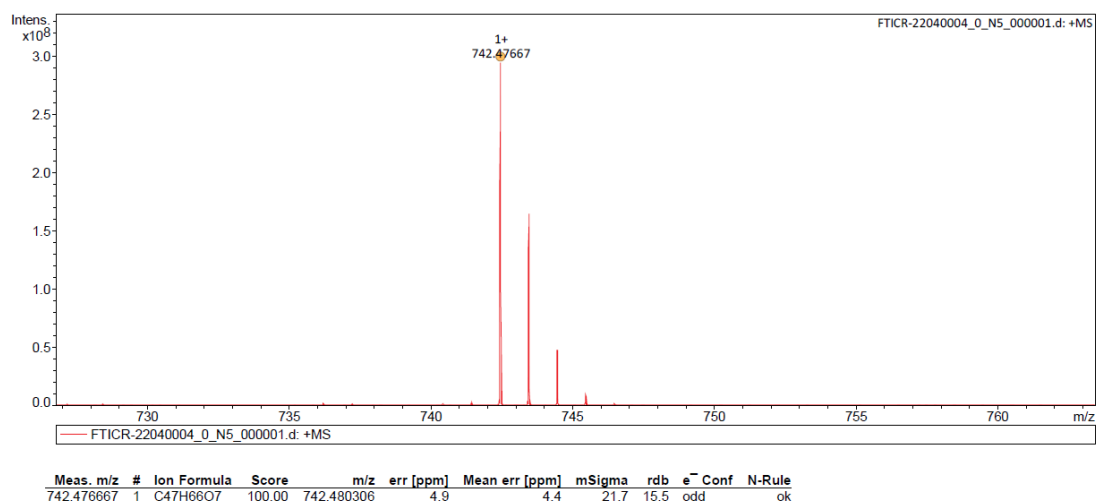

Fig. S37. MS spectrum of Compound T5C2-3

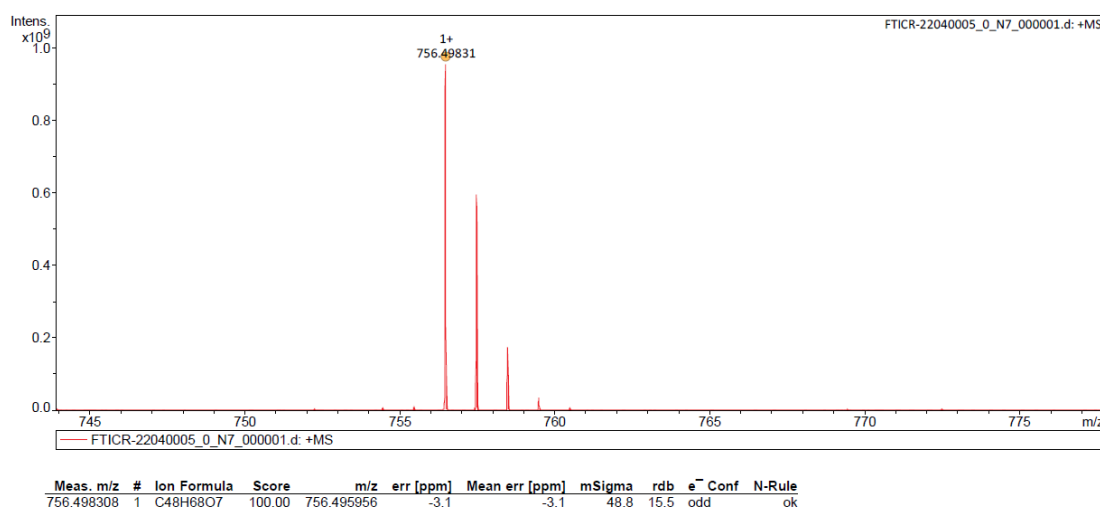

Fig. S38. MS spectrum of Compound T5C2-4

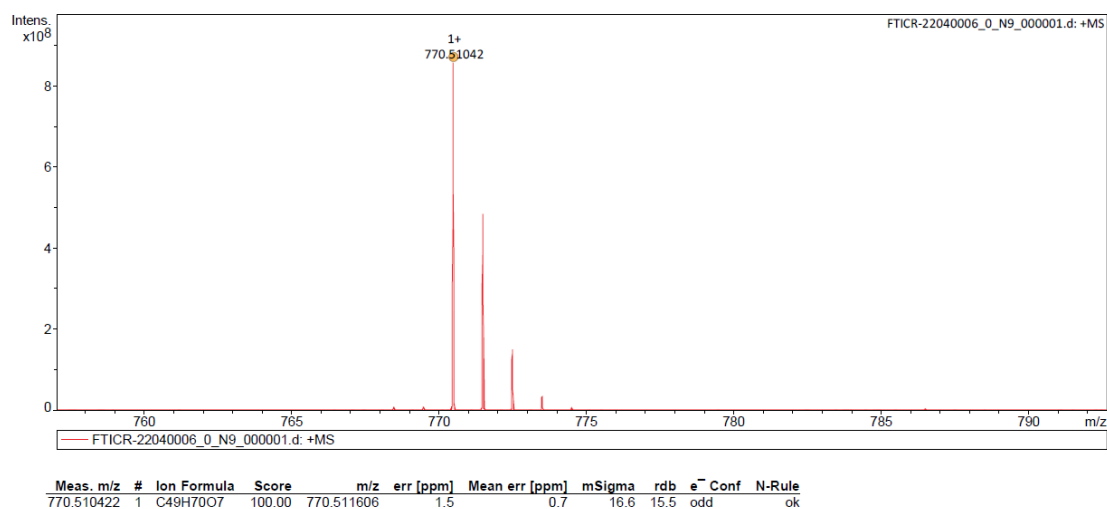

Fig. S39. MS spectrum of Compound T5C2-5

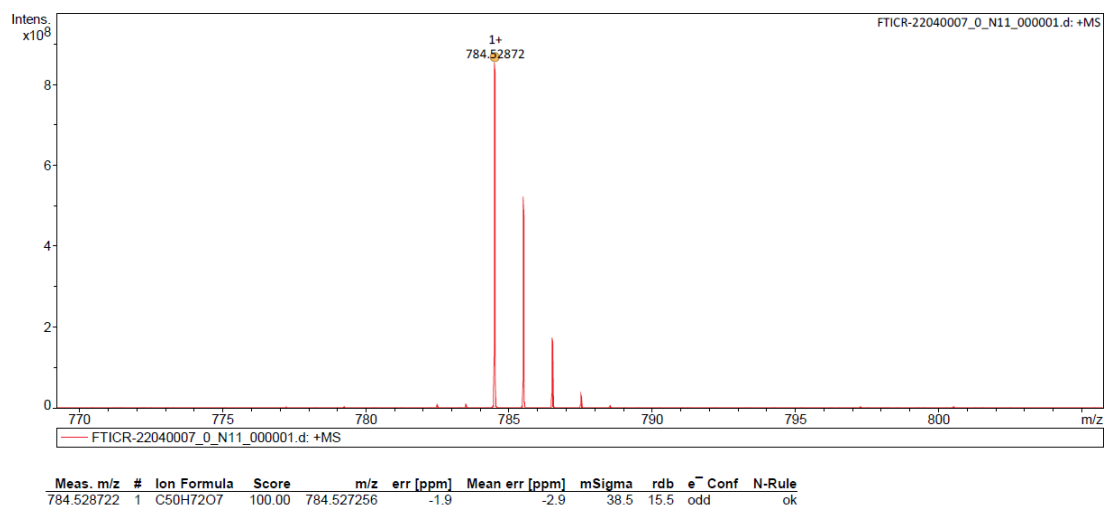

**Fig. S40.** MS spectrum of Compound T5C2-6

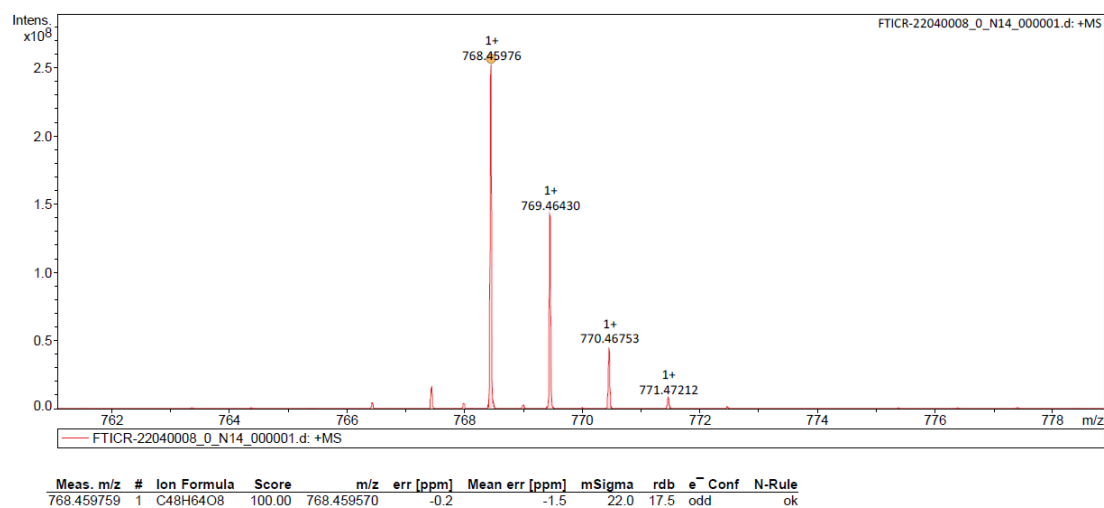

**Fig. S41.** MS spectrum of Compound T5F2

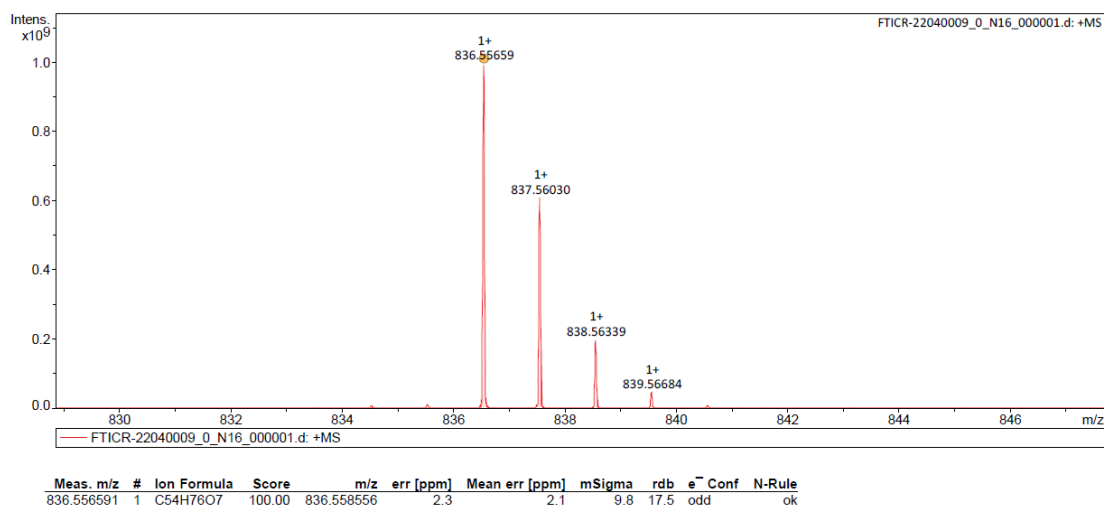

**Fig. S42.** MS spectrum of Compound T5A2

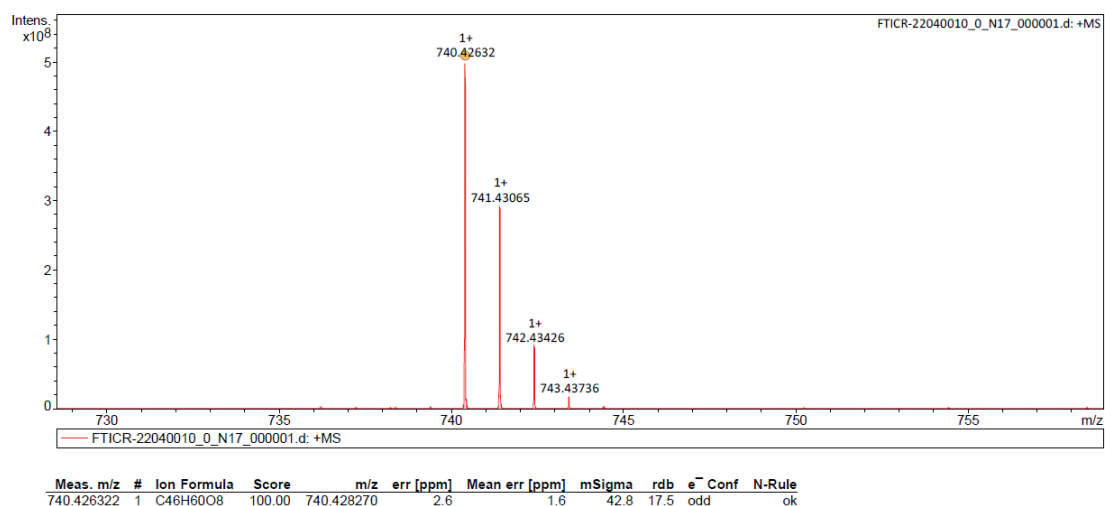

**Fig. S43.** MS spectrum of Compound T5C36-3

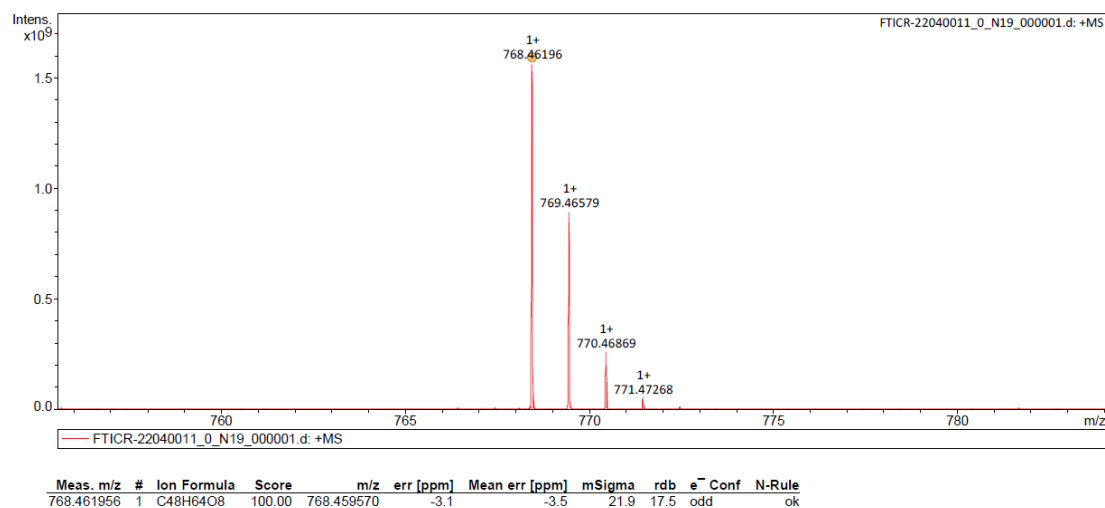

**Fig. S44.** MS spectrum of Compound T5C36-4

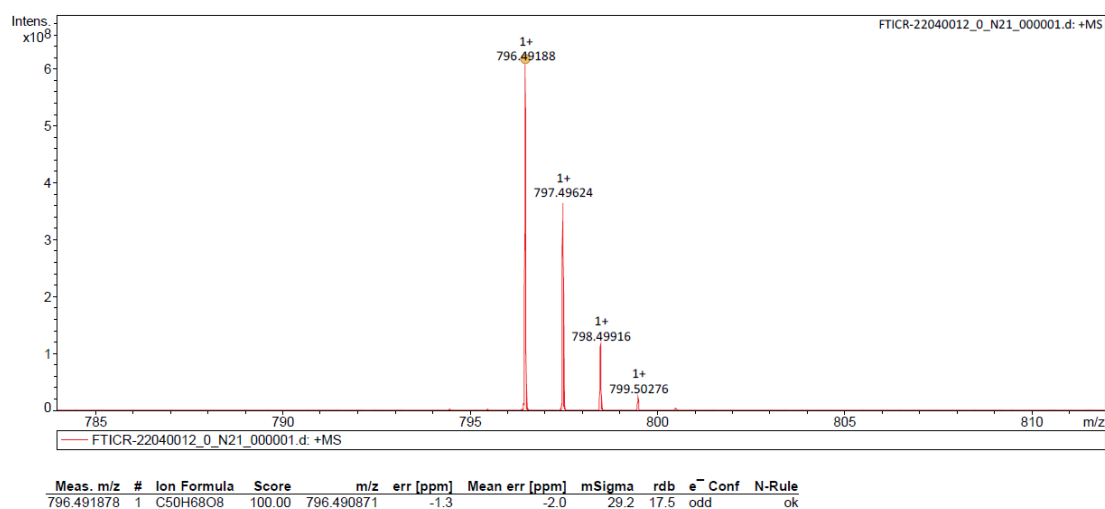

**Fig. S45.** MS spectrum of Compound T5C36-5

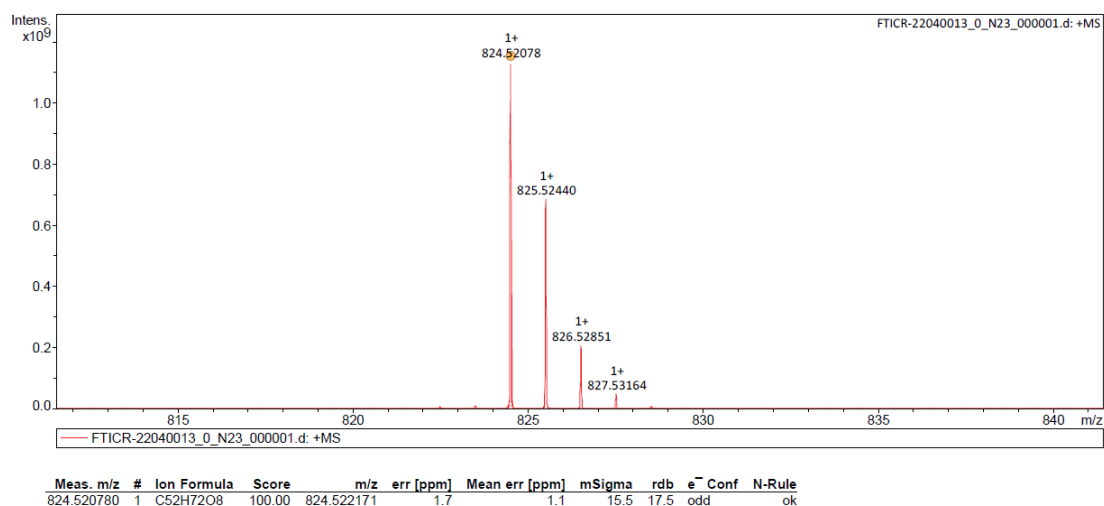

**Fig. S46.** MS spectrum of Compound T5C36-6

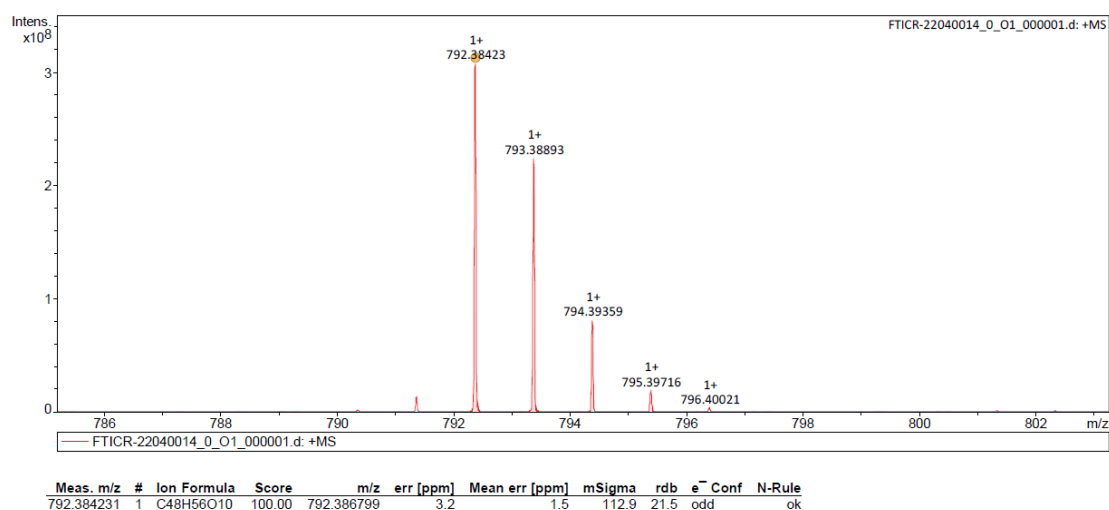

**Fig. S47.** MS spectrum of Compound T5F36

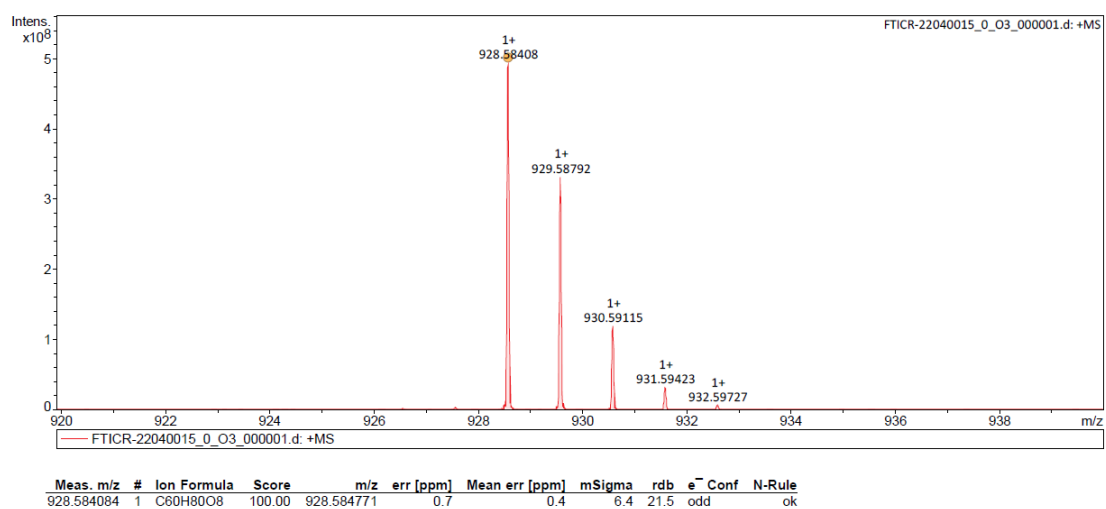

**Fig. S48.** MS spectrum of Compound T5A36

## S8. Full citations for Gaussian 09 program

Ref Gaussian 09, Revision C.01, M. J. Frisch, G. W. Trucks, H. B. Schlegel, G. E. Scuseria, M. A. Robb, J. R. Cheeseman, G. Scalmani, V. Barone, B. Mennucci, G. A. Petersson, H. Nakatsuji, M. Caricato, X. Li, H. P. Hratchian, A. F. Izmaylov, J. Bloino, G. Zheng, J. L. Sonnenberg, M. Hada, M. Ehara, K. Toyota, R. Fukuda, J. Hasegawa, M. Ishida, T. Nakajima, Y. Honda, O. Kitao, H. Nakai, T. Vreven, J. A. Montgomery, Jr., J. E. Peralta, F. Ogliaro, M. Bearpark, J. J. Heyd, E. Brothers, K. N. Kudin, V. N. Staroverov, T. Keith, R. Kobayashi, J. Normand, K. Raghavachari, A. Rendell, J. C. Burant, S. S. Iyengar, J. Tomasi, M. Cossi, N. Rega, J. M. Millam, M. Klene, J. E. Knox, J. B. Cross, V. Bakken, C. Adamo, J. Jaramillo, R. Gomperts, R. E. Stratmann, O. Yazyev, A. J. Austin, R. Cammi, C. Pomelli, J. W. Ochterski, R. L. Martin, K. Morokuma, V. G. Zakrzewski, G. A. Voth, P. Salvador, J. J. Dannenberg, S. Dapprich, A. D. Daniels, O. Farkas, J. B. Foresman, J. V. Ortiz, J. Cioslowski, and D. J. Fox, Gaussian, Inc., Wallingford CT, 2010.

## S9. Supplementary Gauss stimulation results

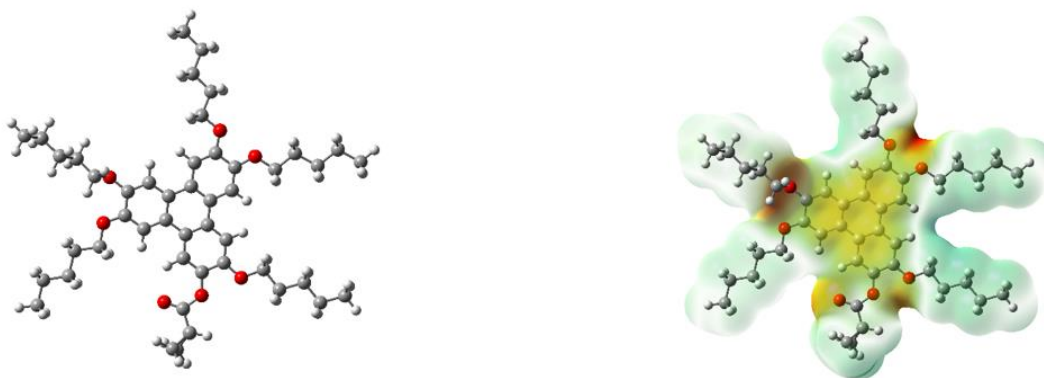

**Fig. S49.** Molecular optimized conformation and electrostatic potential isosurface calculations of compound T5C2-3

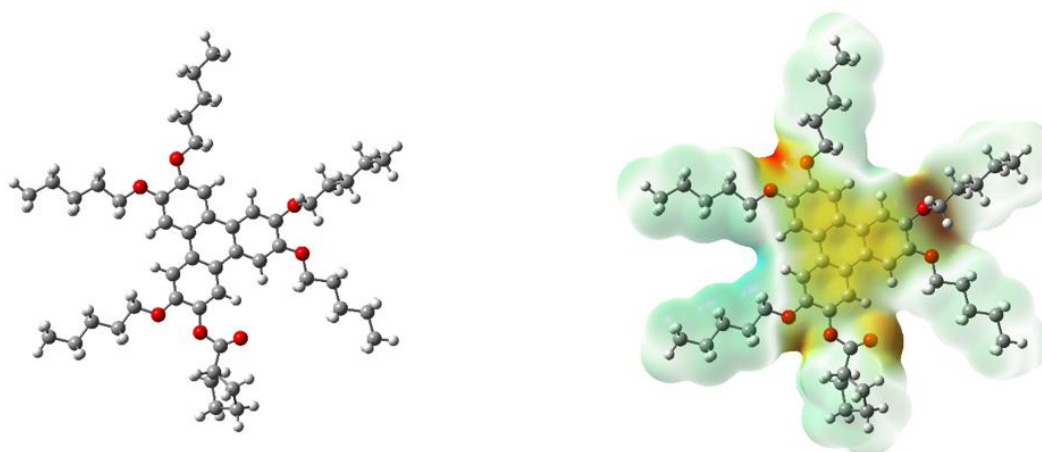

**Fig. S50.** Molecular optimized conformation and electrostatic potential isosurface calculations of compound T5C2-5

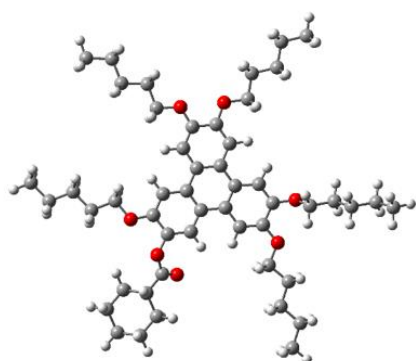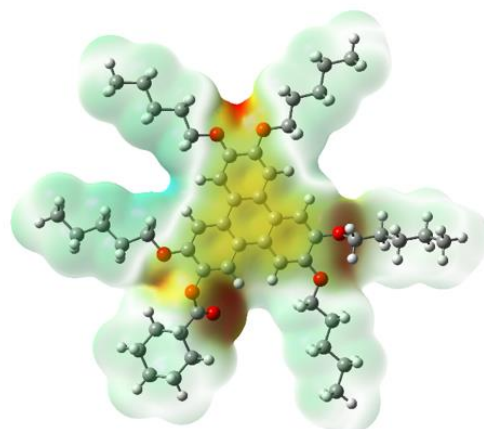

**Fig. S51.** Molecular optimized conformation and electrostatic potential isosurface calculations of compound T5C2-6

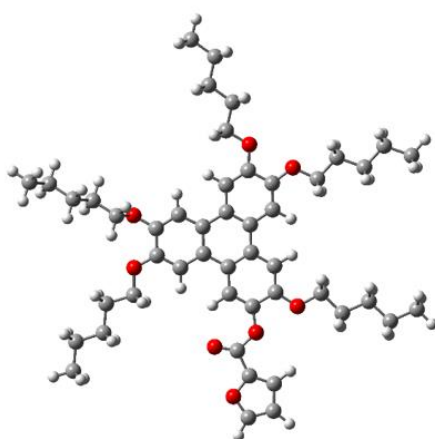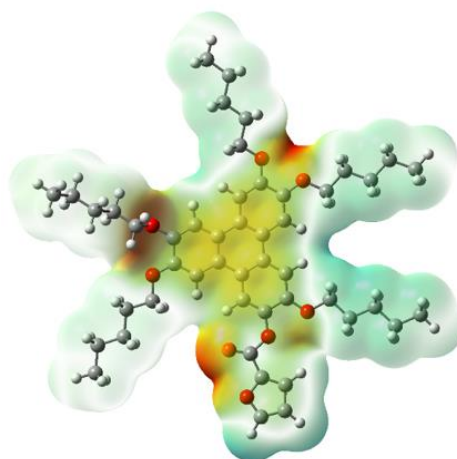

**Fig. S52.** Molecular optimized conformation and electrostatic potential isosurface calculations of compound T5F2

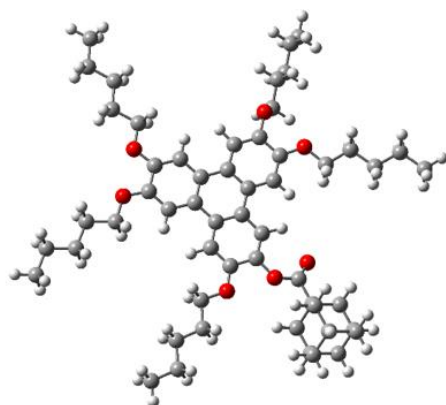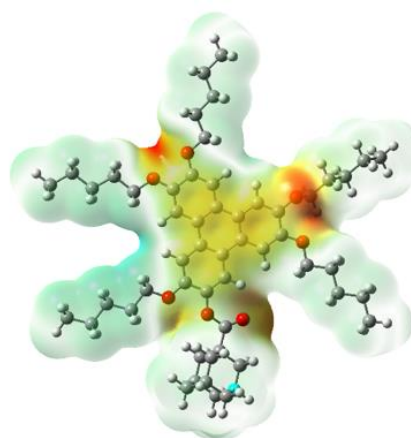

**Fig. S53.** Molecular optimized conformation and electrostatic potential isosurface calculations of compound T5A2



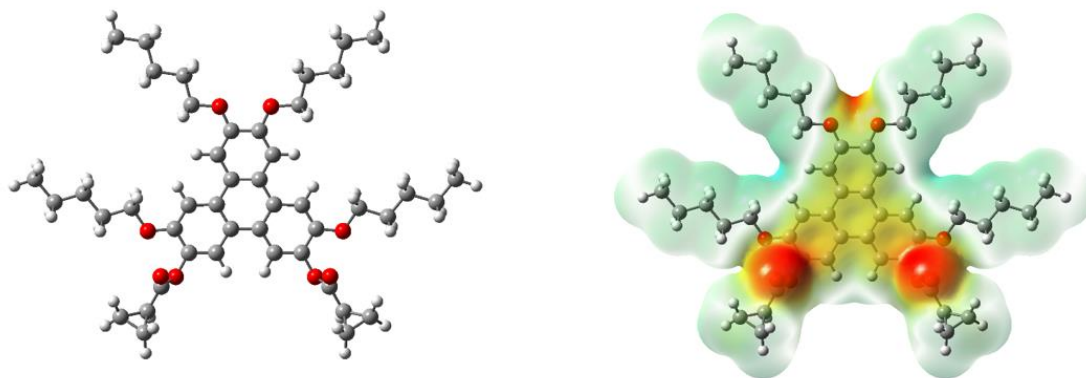

**Fig. S54.** Molecular optimized conformation and electrostatic potential isosurface calculations of compound T5C36-3

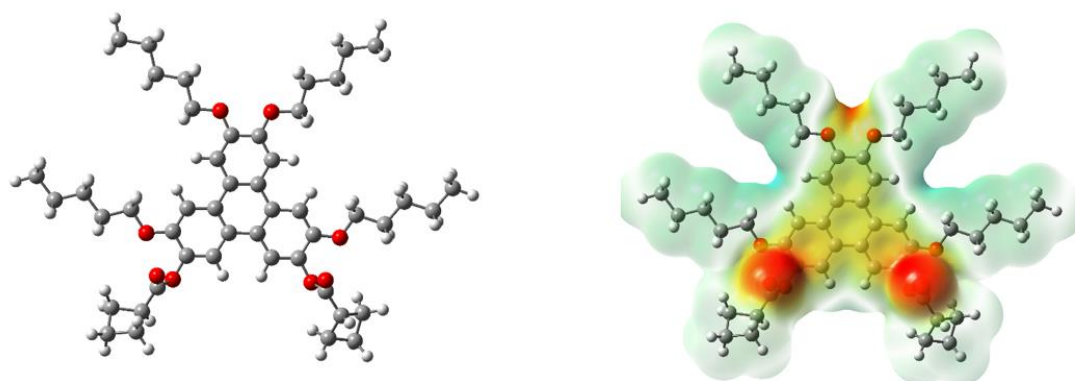

**Fig. S55.** Molecular optimized conformation and electrostatic potential isosurface calculations of compound T5C36-4

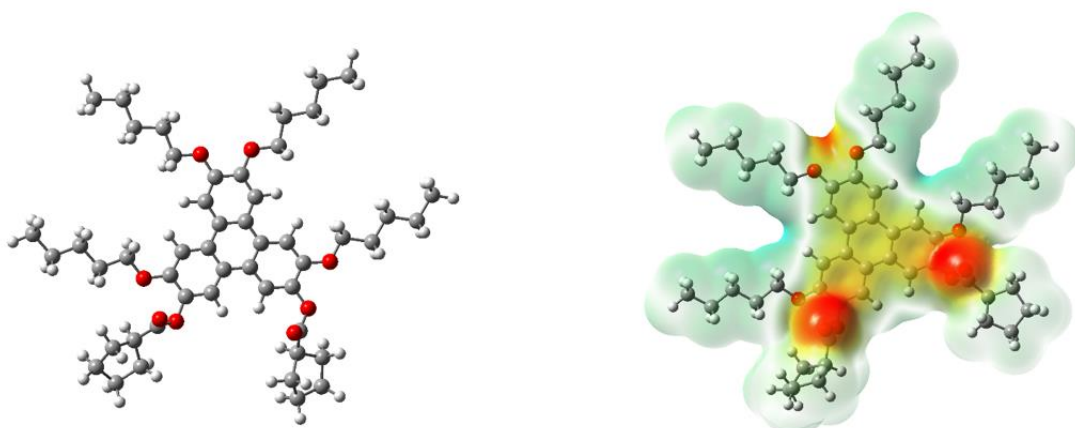

**Fig. S56.** Molecular optimized conformation and electrostatic potential isosurface calculations of compound T5C36-5

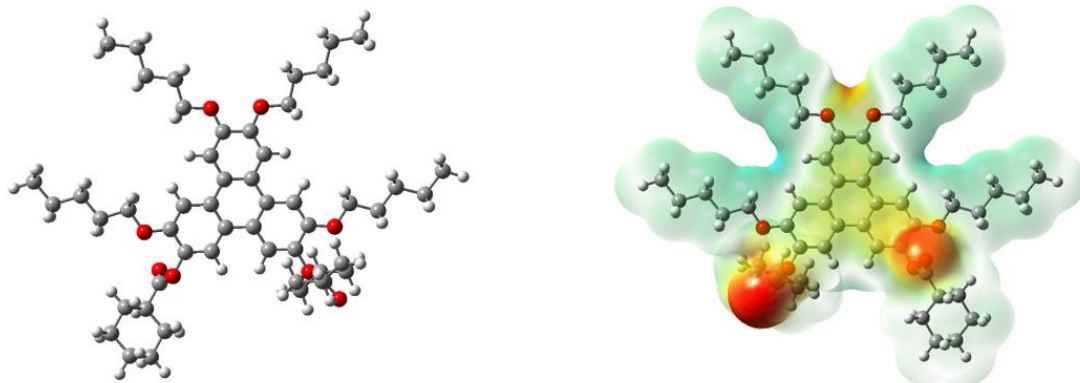

**Fig. S57.** Molecular optimized conformation and electrostatic potential isosurface calculations of compound T5C36-6

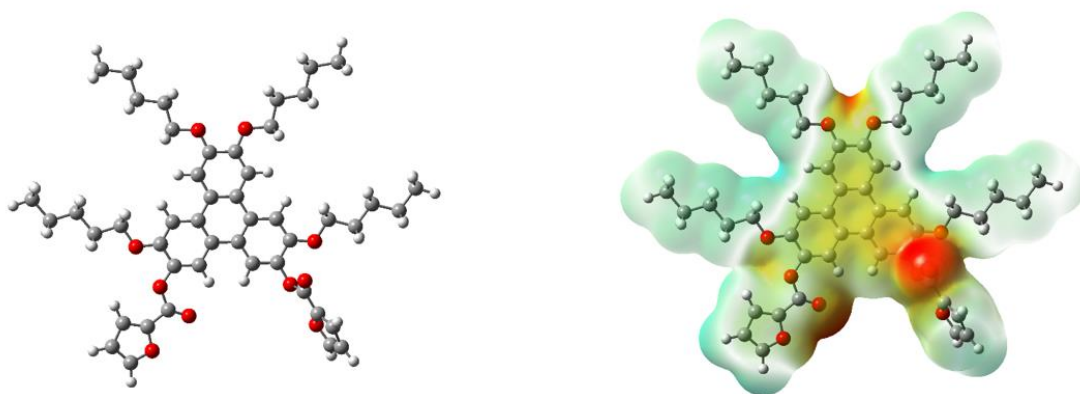

**Fig. S58.** Molecular optimized conformation and electrostatic potential isosurface calculations of compound T5F36

**S10. Table S1 of dipole moments**

| Compound | Dipomoment(Total) | Dipomoment(x) | Dipomoment(y) | Dipomoment(z) |
|----------|-------------------|---------------|---------------|---------------|
| T5C2-3   | 3.04 D            | 2.41 D        | -1.46 D       | -1.15 D       |
| T5C2-4   | 2.91 D            | 2.41 D        | -1.26 D       | 1.04 D        |
| T5C2-5   | 2.88 D            | -2.49 D       | -1.35 D       | 0.58 D        |
| T5C2-6   | 2.90 D            | -2.34 D       | 0.22 D        | 1.69 D        |
| T5F2     | 4.05 D            | 3.70 D        | -1.16 D       | 1.16 D        |
| T5A2     | 2.96 D            | 1.74 D        | -2.31 D       | -0.64 D       |
| T5C36-3  | 2.85 D            | 0 D           | 2.08 D        | -1.95 D       |
| T5C36-4  | 3.66 D            | 0.01 D        | 2.59 D        | -2.58 D       |
| T5C36-5  | 3.31 D            | -0.13 D       | 2.58 D        | -2.07 D       |
| T5C36-6  | 6.97 D            | -0.50 D       | 5.82 D        | 3.81 D        |
| T5F36    | 3.28 D            | -2.17 D       | 2.42 D        | -0.43 D       |

## S11. Mesophase of T5C2-3 ~ T5C2-6, T5F2 and T5A2

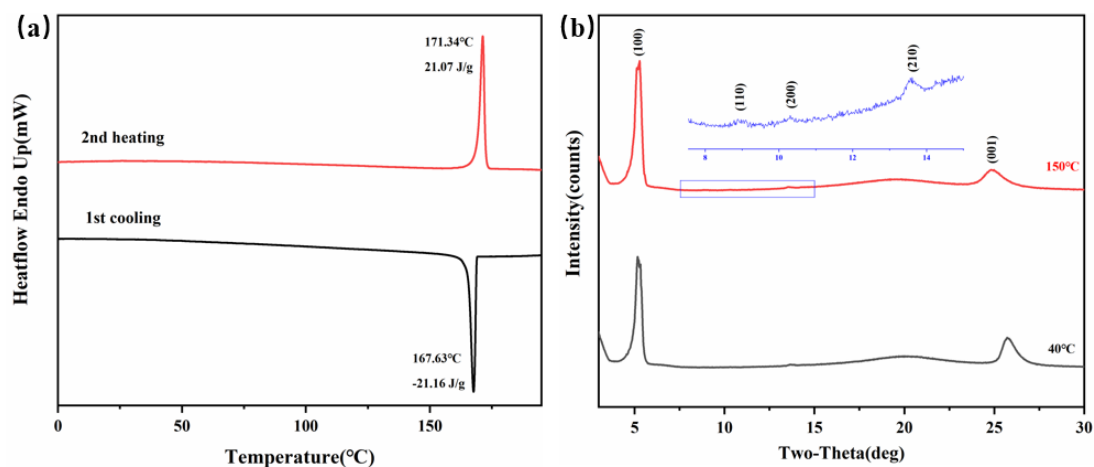

Fig. S59. DSC and 1D WAXD curves of compound T5C2-3

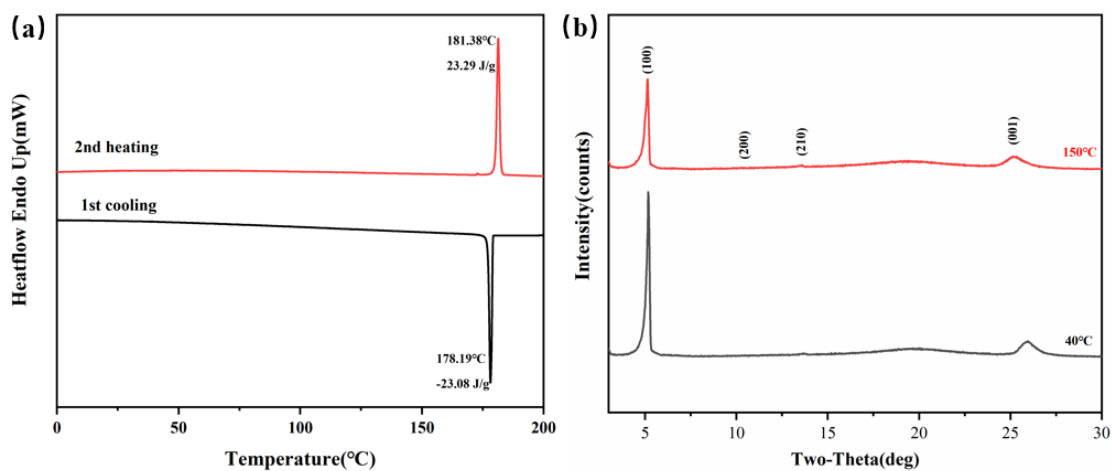

Fig. S60. DSC and 1D WAXD curves of compound T5C2-4

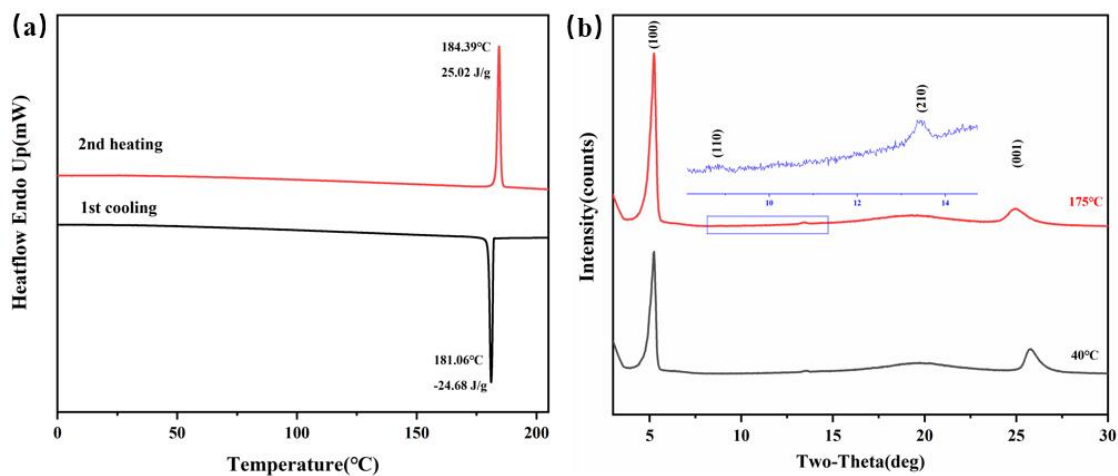

Fig. S61. DSC and 1D WAXD curves of compound T5C2-5

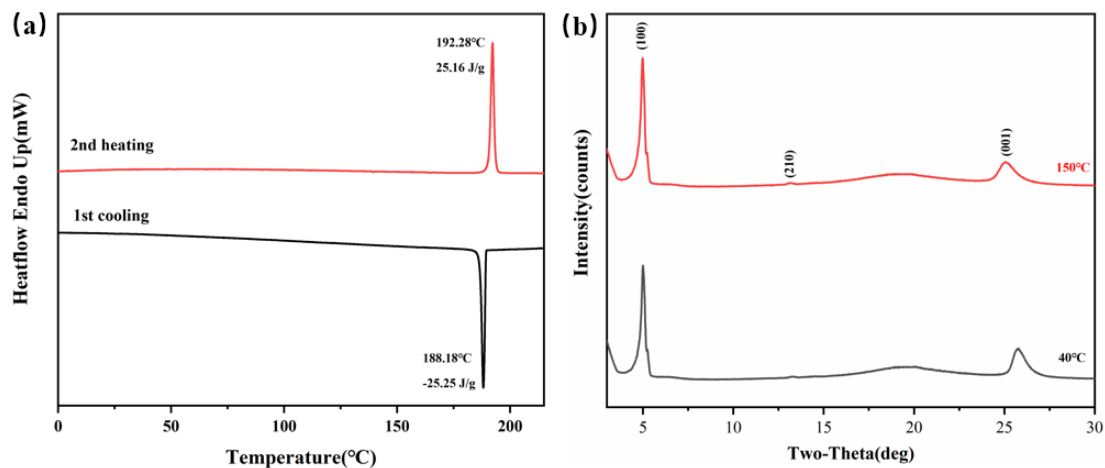

**Fig. S62.** DSC and 1D WAXD curves of compound T5C2-6

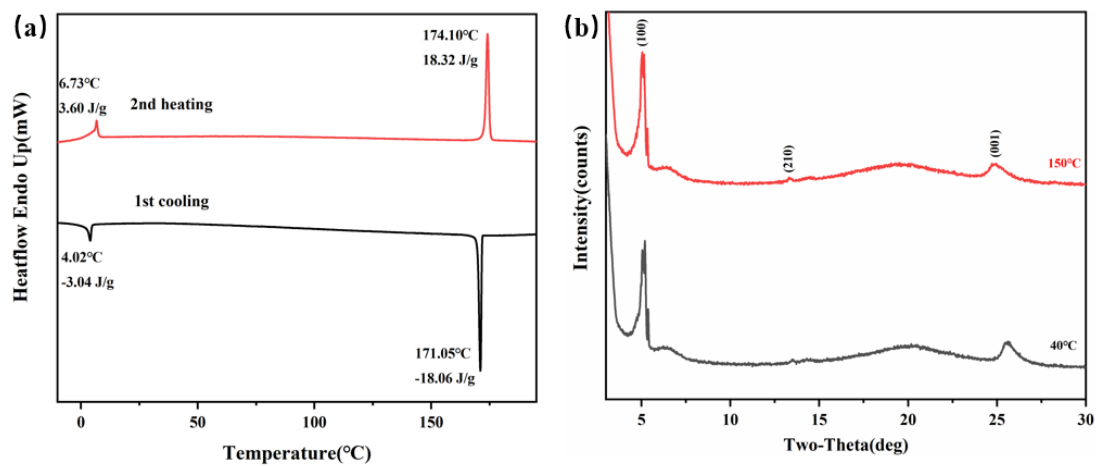

**Fig. S63.** DSC and 1D WAXD curves of compound T5F2

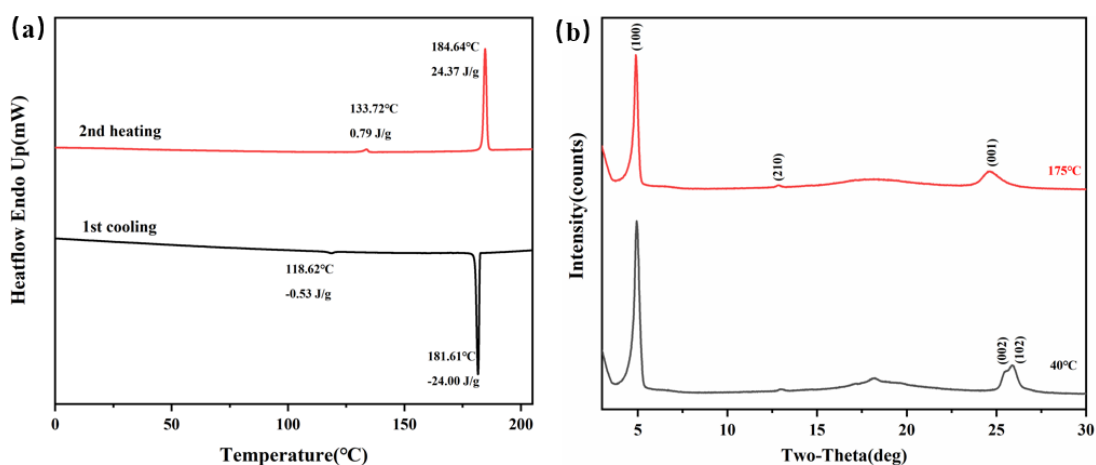

**Fig. S64.** DSC and 1D WAXD curves of compound T5A2

## S12. Mesophase of T5C36-3 ~ T5C36-6, T5F36 and T5A36

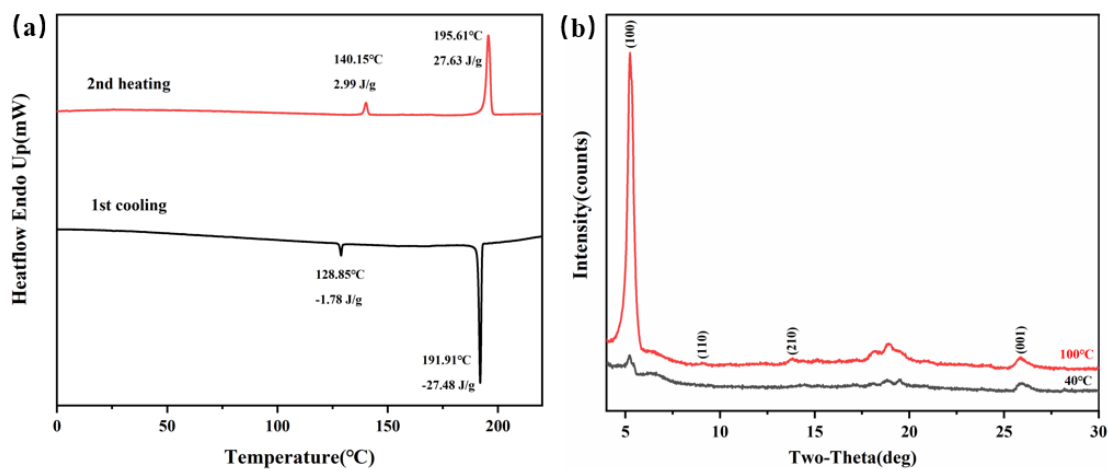

Fig. S65. DSC and 1D WAXD curves of compound T5C36-3

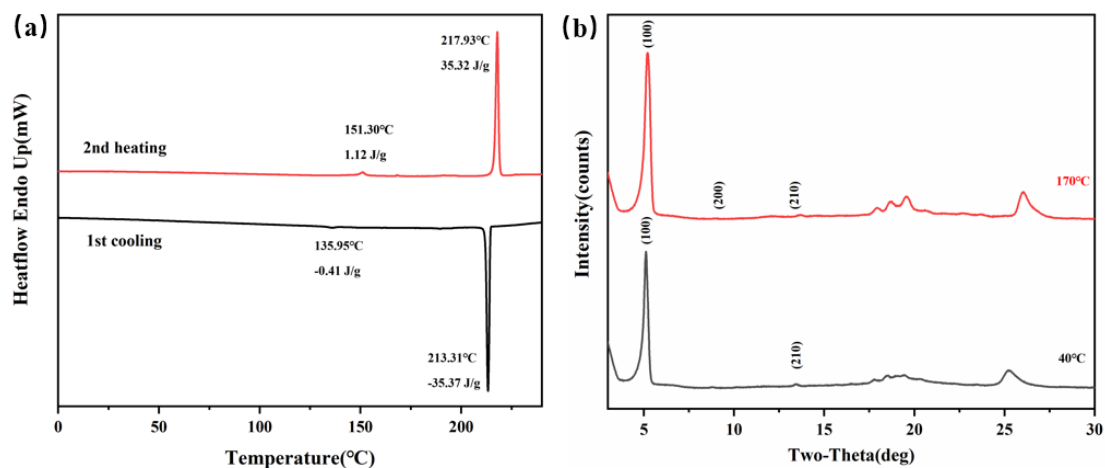

Fig. S66. DSC and 1D WAXD curves of compound T5C36-4

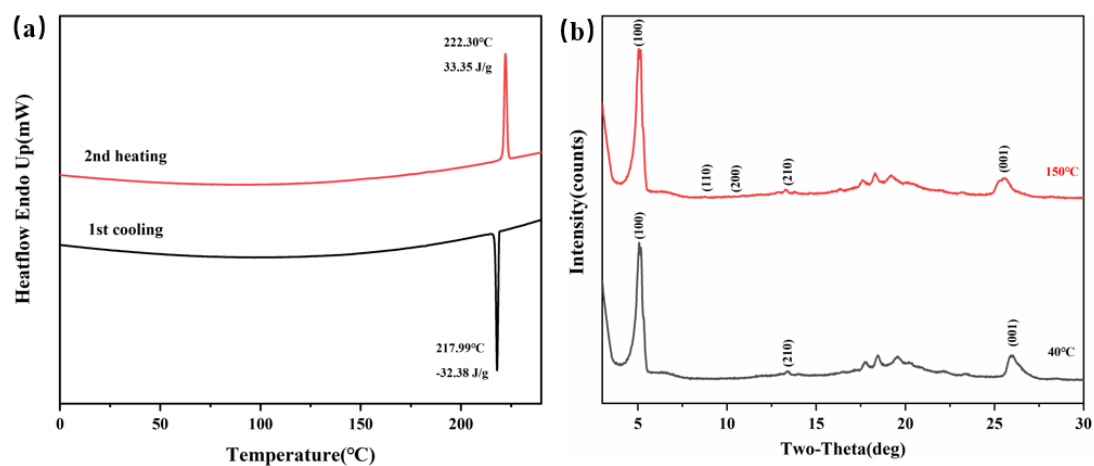

Fig. S67. DSC and 1D WAXD curves of compound T5C36-5

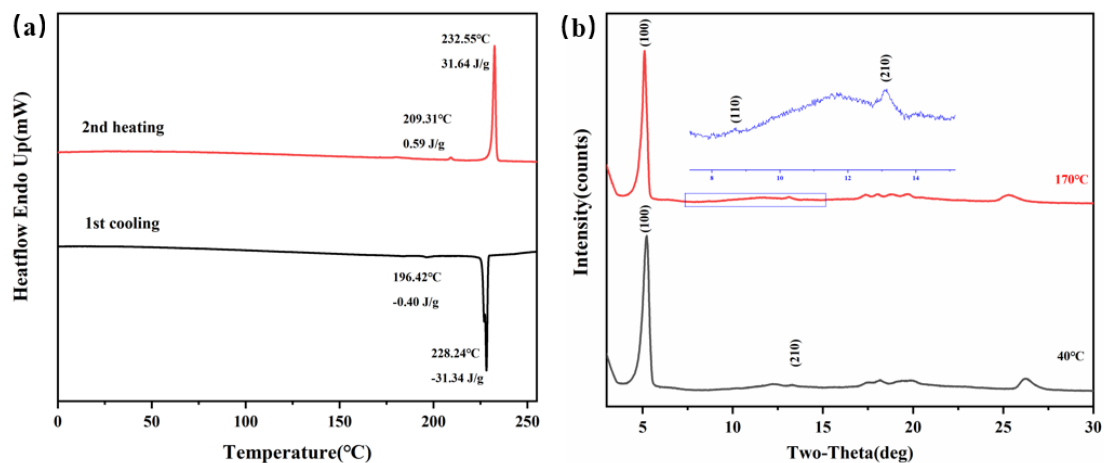

**Fig. S68.** DSC and 1D WAXD curves of compound T5C36-6

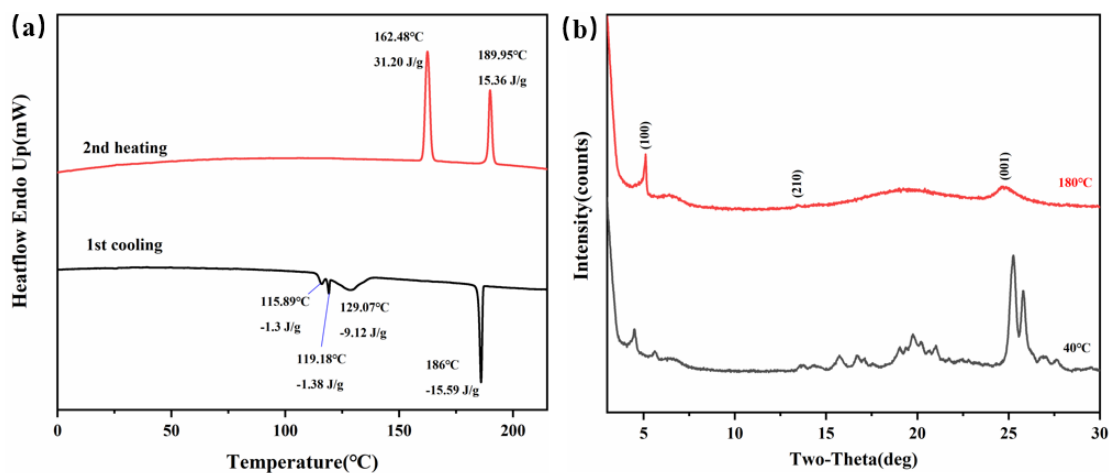

**Fig. S69.** DSC and 1D WAXD curves of compound T5F36

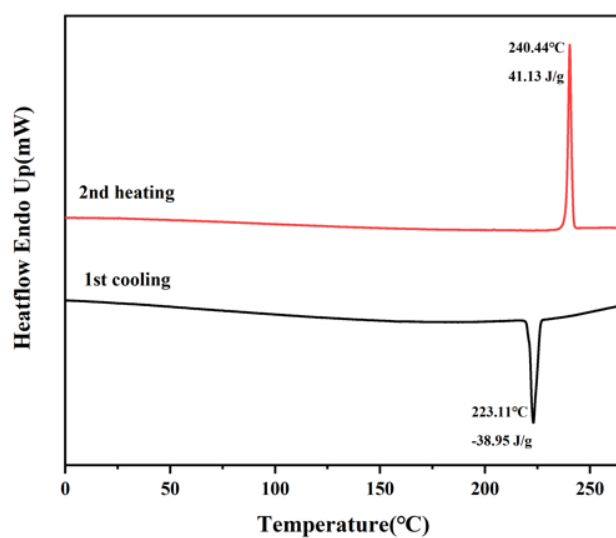

**Fig. S70.** DSC curve of compound T5A36

S13. Molecular structures and DSC curves of T5E2 and T5E36

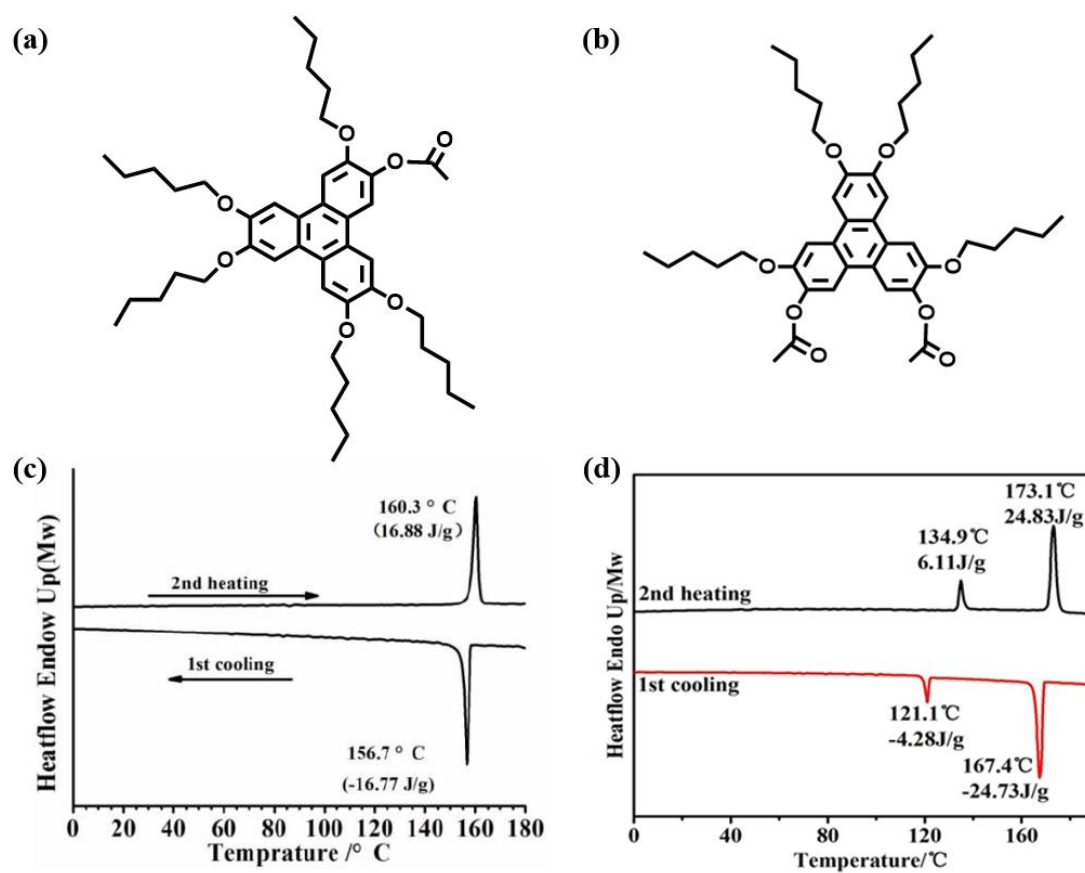

Fig. S71. Molecular structures and DSC curves of compounds (a,c) T5E2 and (b,d) T5E36



S14. POM images of samples T5C2-4, T5C36-4, T5C36-5 and T5C36-6 annealed in the liquid crystal cell

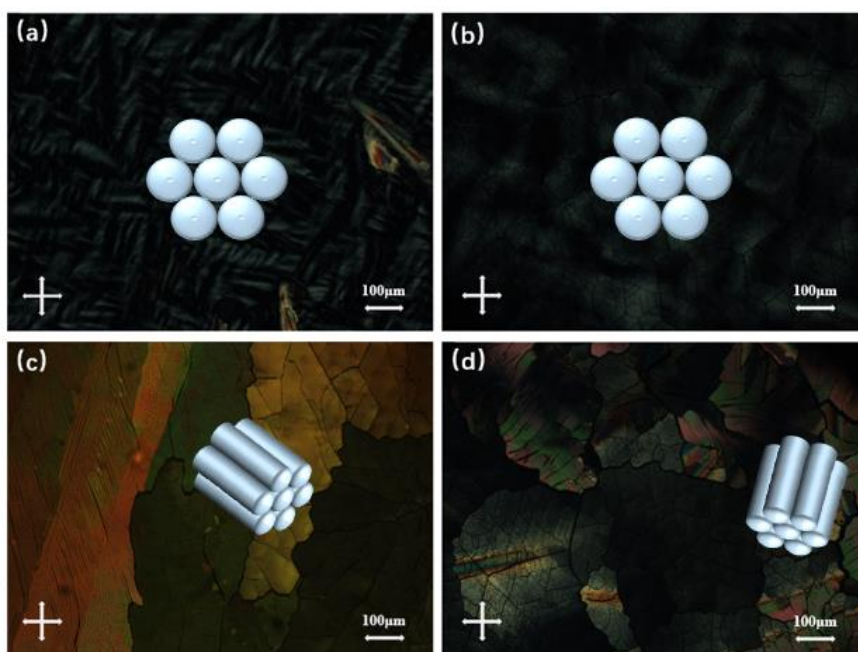

**Fig. S72.** POM images of samples (a) T5C2-4, (b) T5C36-4, (c) T5C36-5 and (d) T5C36-6 annealed in the liquid crystal cell at 40 °C

**S15. Table S2 of charge carrier mobilities**

| Compound | Hole mobility<br>( $\times 10^{-2} \text{ cm}^2 \text{ V}^{-1} \text{ s}^{-1}$ ) | Electron mobility<br>( $\times 10^{-2} \text{ cm}^2 \text{ V}^{-1} \text{ s}^{-1}$ ) |
|----------|----------------------------------------------------------------------------------|--------------------------------------------------------------------------------------|
| T5C2-3   | 2.55                                                                             | 0.62                                                                                 |
| T5C2-4   | 3.84                                                                             | 1.13                                                                                 |
| T5C2-5   | 2.53                                                                             | 2.20                                                                                 |
| T5C2-6   | 1.43                                                                             | 1.30                                                                                 |
| T5F2     | 1.21                                                                             | 0.76                                                                                 |
| T5A2     | 2.34                                                                             | 1.11                                                                                 |
| T5C36-3  | 1.44                                                                             | 1.25                                                                                 |
| T5C36-4  | 1.75                                                                             | 1.07                                                                                 |
| T5C36-5  | —                                                                                | —                                                                                    |
| T5C36-6  | —                                                                                | —                                                                                    |
| T5F36    | 0.61                                                                             | 0.71                                                                                 |
